1 **Weaning age and its effect on the development of the swine gut microbiome and resistome**

2 Devin B Holman<sup>a</sup>, Katherine E. Gzyl<sup>a</sup>, Kathy T. Mou<sup>b</sup>, Heather K. Allen<sup>b</sup>

3

4 <sup>a</sup>Lacombe Research and Development Centre, Agriculture and Agri-Food Canada, 6000 C and E  
5 Trail, Lacombe, Alberta T4L 1W1, Canada

6 <sup>b</sup>USDA, ARS, National Animal Disease Center, 1920 Dayton Ave., Ames, IA, 50010, USA

7

8 Corresponding Author: Devin B. Holman [devin.holman@canada.ca](mailto:devin.holman@canada.ca)

9

10

11

12

13

14

15

16

17

18

19

20

21

22

23

24

25

26 **Abstract**

27 Piglets are often weaned between 19 and 22 d of age in North America although in some swine  
28 operations this may occur at 14 d or less. Piglets are abruptly separated from their sow at weaning  
29 and are quickly transitioned from sow's milk to a plant-based diet. The effect of weaning age on  
30 the long-term development of the pig gut microbiome is largely unknown. In this study, pigs were  
31 weaned at either 14, 21, or 28 d of age and fecal samples collected 21 times from d 4 (neonatal)  
32 through to marketing at d 140. The fecal microbiome was characterized using 16S rRNA gene and  
33 shotgun metagenomic sequencing. The fecal microbiome of all piglets shifted significantly three  
34 to seven days post-weaning with an increase in microbial diversity. Several *Prevotella* spp.  
35 increased in relative abundance immediately after weaning as did butyrate-producing species such  
36 as *Butyricoccus porcorum*, *Faecalibacterium prausnitzii*, and *Megasphaera elsdenii*. Within 7  
37 days of weaning, the gut microbiome of pigs weaned at 21 and 28 days of age resembled that of  
38 pigs weaned at 14 d. Resistance genes to most antimicrobial classes decreased in relative  
39 abundance post-weaning with the exception of those conferring resistance to tetracyclines and  
40 macrolides-lincosamides-streptogramin B. The relative abundance of microbial carbohydrate-  
41 active enzymes (CAZymes) changed significantly in the post-weaning period with an enrichment  
42 of CAZymes involved in degradation of plant-derived polysaccharides. These results demonstrate  
43 that pigs tend to have a more similar microbiome as they age and that weaning age has only a  
44 temporary effect on the gut microbiome.

45

46 **Keywords:** swine, microbiome, metagenomics, resistome, weaning, CAZymes

47

48

## 49 **Introduction**

50 In commercial swine production, the suckling-weaning transition is the most critical period for  
51 piglet health. When piglets are weaned they are abruptly separated from their sow and their diet is  
52 changed from an easily digestible milk-based one to a more complex plant-based diet. The risk of  
53 developing health problems is increased as piglets are subjected to stress as a result of mixing with  
54 unfamiliar piglets, handling, and separation from the sow <sup>1</sup>. This stress frequently leads to reduced  
55 feed intake immediately following weaning which negatively affects growth performance <sup>2</sup>.  
56 Consequently, newly weaned piglets frequently develop post-weaning diarrhea, resulting in  
57 significant economic losses due to associated piglet morbidity, mortality, and treatment <sup>3</sup>. Weaning  
58 times vary but piglets can be weaned as young as 14 d or less in some in North American  
59 commercial swine operations. Earlier weaning ages allow for a greater number of piglets weaned  
60 per sow per year and may also decrease the risk of transmission of certain pathogens from the sow  
61 to piglets. However, piglets that are weaned relatively early may be more susceptible to disease  
62 and other complications <sup>4</sup>.

63 As with humans and other mammals, the gut microbiome is an important factor affecting  
64 swine health. There are an estimated 17 million plus microbial genes in the pig gut microbiome <sup>5</sup>  
65 compared to 20,000 to 25,000 genes in the swine genome <sup>6</sup>. This greatly expands the genetic  
66 potential of the host, particularly as certain microbes can metabolize otherwise non-digestible  
67 dietary carbohydrates into a usable energy source. It has been well documented that the pig gut  
68 microbiome undergoes a rapid shift following weaning including a decrease in members of the  
69 Proteobacteria phylum and *Bacteroides* genus and an increase in genera such as *Prevotella*,  
70 *Roseburia*, and *Succinivibrio* <sup>7-10</sup>. However, relatively little is known about how weaning age  
71 affects the short- and long-term development of the pig gut microbiome. In this study, we weaned

72 pigs at three different ages, 14, 21, and 28 days, and collected fecal samples 21 times from the  
73 neonatal stage until they reached market weight. The fecal microbiome and resistome were  
74 assessed using 16S rRNA gene and shotgun metagenomic sequencing to determine how weaning  
75 age affected both over the course of the swine production cycle.

## 76 **Results**

### 77 *Effect of weaning age on pig performance*

78 As expected, all pigs gained less weight in the 7 d post-weaning period compared to pigs  
79 that were either still nursing or had already been on solid feed for longer than 7 d (Fig. 1). From d  
80 35 onward pigs from all weaning age groups grew at the same rate. There was also no association  
81 with weaning age and a pig being removed from the study due to antimicrobial treatment or death  
82 ( $P > 0.05$ ).

### 83 *Sequencing*

84 The 16S rRNA gene sequencing of the mock community reflected the expected  
85 composition with minor exceptions. There was a larger than expected relative abundance of  
86 *Clostridium* (Supplementary Table S1) and an absence of *Cutibacterium acnes* (formerly  
87 *Propionibacterium acnes*); however, this species is known to be poorly amplified by the primers  
88 used in this study<sup>11</sup>. After processing, there were  $35,448 \pm 1,247$  SEM 16S rRNA gene sequences  
89 and  $16,699,263 \pm 680,292$  shotgun metagenomic paired-end sequences per sample. For the  
90 metagenomic samples, host contamination accounted for  $42.3\% \pm 2.0\%$  of the sequences.

### 91 *Weaning age and the development of the gut microbiome*

92 Weaning age had a strong but temporary effect on the gut microbial community structure  
93 (Fig. 2; Supplementary Table S2; Supplementary Fig. S1). Within three days of weaning (d 18),  
94 the d 14-weaned pigs had a gut microbiota that was significantly different from that of the pigs

95 that were still nursing (PERMANOVA:  $R^2 > 0.25$ .  $P < 0.001$ ). By 25 days of age, the gut  
96 microbiota of piglets weaned on d 21 was significantly different from that of both the d 14- and d  
97 28-weaned groups (PERMANOVA:  $R^2 \geq 0.13$ .  $P < 0.001$ ). However, on d 28, the d 14- and d 21-  
98 weaned piglets largely clustered together and separately from the d 28-weaned piglets which were  
99 still nursing up to that point. Interestingly, the gut microbial community structure of piglets weaned  
100 at 28 days of age remained significantly different from that of the d 14-weaned pigs at d 35 and  
101 from the d 21-weaned pigs until and including d 42.

102         There was an increase in richness (number of OTUs) and diversity (Shannon diversity  
103 index) four days post-weaning in the d 14-weaned piglets compared to the still-nursing piglets  
104 (Fig. 3A, B). Similarly, from d 25 to 29, both the d 14- and d 21-weaned piglets had greater  
105 diversity and richness than the still-nursing d 28-weaned group. These differences had disappeared  
106 by d 32, and with the exception of d 42 when the d 28-weaned piglets had a richer microbiota than  
107 the other two groups, the diversity of the piglet gut microbiota was not affected by age at weaning.  
108 Based on the shotgun metagenomic sequencing analysis, the shifts observed in the gut microbiome  
109 post-weaning were associated with a number of different bacterial species (Fig. 3C; Supplementary  
110 Table S3, S4). Among those that increased in relative abundance post-weaning were several  
111 *Prevotella* spp. including *Prevotella copri*, *Prevotella pectinovora*, *Prevotella* sp. P2-180,  
112 *Prevotella* sp. P3-122, and *Prevotella stercorea*. *Butyricoccus porcorum*, *Faecalibacterium*  
113 *prausnitzii*, *Selenomonas bovis*, and *Treponema porcinum* were also among those significantly  
114 enriched in pigs that had been weaned at either d 14 or 21 compared to piglets that were not weaned  
115 until d 28 ( $P < 0.05$ ).

116         Bacterial species that were consistently associated with nursing pigs included  
117 *Anaeromassilibacillus senegalensis*, *Bacteroides fragilis*, *Clostridioides difficile*, *Clostridium*

118 *porci*, *Clostridium scindens*, *Desulfovibrio piger*, *Escherichia coli*, *Phocaeicola vulgatus*, and  
119 *Shigella sonnei* (Supplementary Table S4). At 35 days of age, only three bacterial species were  
120 differentially relatively abundant between the d 14- and d 21-weaned pigs and those weaned on d  
121 28: *Bariatricus massiliensis*, *B. porcorum*, and *D. piger*, all of which were enriched in the d 14-  
122 weaned pigs (Supplementary Table S4). Once the pigs had reached 70 days of age, there were no  
123 bacterial species with a relative abundance greater than 0.1% that differed among the groups ( $P >$   
124 0.05).

### 125 ***Functional changes in the microbiome post-weaning***

126 Functional profiling of the gut microbiome was carried out using the MetaCyc metabolic  
127 pathway database and the CAZy database of carbohydrate-active enzymes (CAZymes). The  
128 relative abundance of the CAZymes and MetaCyc pathways shifted in a similar way to the  
129 microbial taxa post-weaning (Fig. 4A, B). The CAZymes are grouped into the following classes:  
130 auxiliary activities (AAs), carbohydrate esterases (CEs), glycoside hydrolases (GHs),  
131 glycosyltransferases (GTs), polysaccharide lyases (PLs), and carbohydrate-binding modules  
132 (CBMs) which have no enzymatic activity but aid and enhance the catalytic activity of other  
133 CAZymes. In total, 237 CAZy families were detected among all samples (Supplementary Table  
134 S5) in comparison with only 61 found within the pig genome (Supplementary Table S6). All of  
135 the CAZyme classes decreased in relative abundance after weaning (Fig. 4C). Overall, 61.5% of  
136 the CAZymes were classified as glycoside hydrolases and 24.7% as glycosyltransferases.  
137 However, there were still a number of CAZy families that were enriched in the gut microbiomes  
138 of post-weaned pigs compared to those still nursing (Supplementary Table S7). The only AA  
139 identified was AA10 (copper-dependent lytic polysaccharide monooxygenases) and in only 35 of  
140 the samples (Supplementary Table S5).

141           At 21 days of age, there were 141 unique CAZy families that were differentially abundant  
142 between the d 14-weaned pigs and the d 21- and 28-weaned piglets that were still nursing ( $P <$   
143  $0.05$ ; Supplementary Table S7). Similarly, at 28 days of age, 134 CAZy families were  
144 differentially abundant between the still nursing d 28-weaned piglets and the post-weaned d 14-  
145 and d 21-weaned pigs ( $p < 0.05$ ; Supplementary Table S7). There were no differences in CAZy  
146 family relative abundance among the three weaning age groups by d 35 ( $P > 0.05$ ). Many of the  
147 alterations in the CAZyme profiles post-weaning reflect the change in diet with CAZy families  
148 with lactose-degradation activity (GH2 and GH42) and activity against other components of  
149 porcine milk oligosaccharides (PMOs) (GH16, GH18, GH20, GH29, GH30, GH35, GH95,  
150 GH139, and GH141) enriched in pigs that were nursing compared to those that had been weaned.  
151 Meanwhile, CAZy families including CBMs with mannan- pectin-, starch-, and xylan-binding  
152 functions (CBM23, CBM25 CBM26, and CBM77) and GHs with activity against plant cell  
153 carbohydrates (GH5, GH39, GH48, GH53, GH93, and GH94)<sup>12,13</sup>, were more relatively abundant  
154 in post-weaned pigs that were consuming only a plant-based solid feed.

155           A large number of MetaCyc metabolic pathways were also differentially abundant between  
156 weaned and nursing piglets at d 21 (196 unique pathways) and d 28 (231 unique pathways) with  
157 the majority enriched in the gut microbiome of nursing piglets (Supplementary Tables S8 and S9).  
158 As with the CAZymes there was an enrichment of MetaCyc pathways involved in fucose and  
159 lactose degradation in the nursing piglets and an increased relative abundance of certain starch  
160 degradation pathways post-weaning.

### 161 ***Weaning age and the gut resistome***

162           Antimicrobial resistance remains a serious challenge to the swine industry and therefore  
163 we also characterized the antimicrobial resistome of the pigs longitudinally and in response to

164 weaning age. Similar to the functional analysis, samples clustered by weaning age on d 21 and d  
165 28 when assessed using the relative abundance of antimicrobial resistance genes (ARGs) (Fig.  
166 5A). The large majority of ARGs that were differentially abundant were enriched in the nursing  
167 piglets compared to the weaned pigs (Supplementary Table S10). Notable ARGs that were more  
168 relatively abundant in the weaned pigs included *bla<sub>ACI-1</sub>*, *cfxA6*, *erm(Q)*, *tet(44)*, and *tet(L)*. The  
169 relative abundance of ARGs conferring resistance to multiple drugs, aminoglycosides,  
170 polypeptides, and quinolones as well as several other drug classes decreased post-weaning in all  
171 weaning age groups (Fig. 5B). However, tetracycline resistance genes remained relatively stable  
172 throughout the pig production cycle. Of the 250 unique ARGs detected, *tet(Q)*, *tet(W)*, *tet(O)*,  
173 *aph(3')-IIIa*, *mel*, *tet(W/N/W)*, *tet(40)*, and *tet(44)* were the most relatively abundant among all  
174 samples (Supplementary Table S11).

## 175 **Discussion**

176 As expected, there was a substantial shift in the pig gut microbiome within three days of  
177 weaning. The sudden change from a milk-based diet to one that is plant-based and less digestible  
178 by the pig is largely responsible for this shift immediately post-weaning<sup>1, 14</sup>. However, weaning  
179 age had no apparent long-term effects on the gut microbiome or the average daily gain of the pigs.  
180 A recent study by Massacci et al.<sup>15</sup> that also weaned pigs at different ages (14, 21, 28, and 42 d)  
181 with sampling up to 60 d of age also reported no weaning age effect on the microbial community  
182 structure at 60 d. Therefore, it appears that a later weaning age only delays post-weaning changes  
183 in the gut microbiome rather than affecting the assembly and stability of the microbial community.

184 Several short-chain fatty acid-producing bacterial species were prevalent among those that  
185 were more relatively abundant in pigs that had been weaned. These included *Anaerovibrio slackiae*  
186 (acetate, propionate), *B. porcorum* (butyrate), *Coprococcus catus* (butyrate, propionate), *F.*



187 *prausnitzii* (butyrate), *Megasphaera elsdenii* (acetate, butyrate, propionate),  
188 *Phascolarctobacterium succinatutens* (propionate), *P. copri* (acetate), *Prevotella mizrahi*  
189 (acetate), *P. pectinovora* (acetate), and *S. bovis* (acetate, propionate)<sup>16-21</sup>. Short-chain fatty acid-  
190 production occurs mostly in the lower gastrointestinal tract of pigs as a result of bacterial  
191 fermentation of undigested carbohydrates<sup>22</sup>. Acetate, butyrate, and propionate have anti-  
192 inflammatory effects on the host<sup>23</sup> and provide up to 25% of daily energy requirements in pigs<sup>24</sup>.  
193 Butyrate in particular is the primary energy source of colonocytes and regulates apoptosis<sup>25</sup>.

194 Interestingly, *F. prausnitzii* has also been reported to be more relatively abundant at 60  
195 days of age in pigs weaned at 21, 28, and 42 d vs. 14 d<sup>15</sup> and in healthy pigs vs. those with post-  
196 weaning diarrhea<sup>26</sup>. *Butyricoccus porcorum* has been associated with higher feed efficiency as  
197 have *Treponema porcinum* and *Treponema succinifaciens* which were also more relatively  
198 abundant in weaned pigs here<sup>27</sup>. In-feed supplementation with *Butyricoccus pullicaecorum* has  
199 been shown to improve health and feed efficiency in broiler chickens<sup>28</sup> and *F. prausnitzii* reduced  
200 intestinal permeability and cytokine expression in a mouse colitis model<sup>29</sup>. Therefore, *B.*  
201 *porcorum* and *F. prausnitzii*, as well as potentially other bacterial species that were more relatively  
202 abundant in weaned pigs, are attractive targets for microbiome manipulation and further study into  
203 their role in pig gut health.

204 The bacterial species that were enriched in the microbial communities of pigs that were  
205 still nursing at d 21 and d 28 include several potentially pathogenic species such as *C. difficile*, *E.*  
206 *coli*, *S. sonnei*, and *Streptococcus suis*. It is difficult to assess virulence of these species here,  
207 however, the presence of potentially pathogenic bacteria pre-weaning may be a risk factor for post-  
208 weaning morbidity and mortality<sup>30</sup>. Although, many of the more relatively abundant bacterial  
209 species were differentially abundant pre- and post-weaning, several remained relatively stable

210 throughout the pig production cycle. In particular, *Lactobacillus johnsonii*, *Mogibacterium*  
211 *kristiansenii*, and *Subdoligranulum variabile* were not affected by weaning. Among these bacterial  
212 species *L. johnsonii* is the best described and has been reported to improve sow reproductive  
213 performance<sup>31</sup> and average daily gain in piglets during the first 35 days of life<sup>32</sup> when delivered  
214 in feed. *S. variabile*, a butyrate-producing bacterial species, is the only member of its genus and  
215 has been previously reported to be a member of the “core microbiota” of the pig gastrointestinal  
216 tract<sup>33</sup>. *M. kristiansenii* has only recently been described and was originally isolated from pig feces  
217<sup>18</sup>.

218 The functional profile of the gut microbiome also shifted after weaning in all weaning age  
219 groups similar to that of the taxonomic profiles. This included a decrease in the relative abundance  
220 of all CAZy families post-weaning. The CAZymes encoded by the pig genome are greatly  
221 outnumbered by those in the gut microbiome thereby providing the host with an additional source  
222 of energy as discussed earlier. Sow’s milk contains not only lactose but at least 119 PMOs<sup>34</sup> which  
223 are composed of the monosaccharides fucose, galactose, glucose, N-acetylglucosamine, N-  
224 acetylgalactosamine, and sialic acid bound to a lactose or N-actelyllactosamine core<sup>35</sup>. These  
225 PMOs are generally resistant to host digestive enzymes in the small intestine and are instead  
226 fermented by the colonic microbiome into SCFAs<sup>36,37</sup>.

227 In humans, *Bifidobacterium* and *Bacteroides* spp., including *B. fragilis* and *P. vulgatus*  
228 (formerly *Bacteroides vulgatus*), have been shown to metabolize human milk oligosaccharides<sup>38</sup>.  
229 *Bacteroides fragilis*, which was among the most relatively abundant species in nursing piglets  
230 here, carries a number of glycoside hydrolase family genes that facilitate breakdown of milk  
231 oligosaccharides<sup>39</sup>. Metabolites from the degradation of sialylated bovine milk oligosaccharides  
232 by *B. fragilis* has also been shown to enhance the growth of *E. coli* in vitro<sup>40</sup>. All of the GH

233 families found in *B. fragilis*, i.e., GH2, GH16, GH18, GH20, GH29, GH33, and GH95, were  
234 enriched in the gut microbiomes of nursing piglets. Similarly, GH families and CBMs associated  
235 with degradation of plant polysaccharides were more relatively abundant in fecal samples from  
236 pigs that had been weaned and consuming a solid plant-based diet for at least 7 d.

237 The relative abundance of ARGs within several antimicrobial classes decreased post-  
238 weaning. However, ARGs conferring resistance to the tetracycline and MLS<sub>B</sub> classes remained  
239 relatively stable throughout the study despite the fact that none of the pigs were exposed to any  
240 antimicrobials. Not surprisingly, these are the antimicrobial classes with the longest history of use  
241 in swine production and are still among the most frequently administered antimicrobials in North  
242 American pigs<sup>41, 42</sup>. This background level of tetracycline and MLS<sub>B</sub> resistance probably also  
243 explains why several studies have reported limited or only temporary effects on the pig gut  
244 microbiome following exposure to drugs of these antimicrobial classes<sup>8, 43, 44</sup>. The reason for the  
245 significant decrease in other ARGs after weaning is likely due to the post-weaning shift in bacterial  
246 taxa carrying these ARGs. For example, many of the relatively abundant multidrug ARGs such as  
247 *mdtF*, *acrF*, *evgS*, *acrB*, *mdtO*, *mdtP*, and *cpxA*, are found in the majority of *E. coli* and *S. sonnei*  
248 genomes and both of these species decreased in relative abundance post-weaning. In contrast,  
249 relatively abundant tetracycline resistance genes such as *tet(Q)*, *tet(W)*, and *tet(O)* have a much  
250 wider host range<sup>45</sup>.

251 Two of the ARGs that were more relatively abundant in weaned piglets compared to those  
252 still nursing were the Ambler class A beta-lactamase genes *bla<sub>CfxA6</sub>* and *bla<sub>ACI-1</sub>*. Additionally,  
253 *bla<sub>CfxA2</sub>* was enriched in piglets weaned at d 14 and 21 compared to those still nursing on d 28.  
254 Both *bla<sub>CfxA2</sub>* and *bla<sub>CfxA6</sub>* have been identified in several *Prevotella* spp.<sup>46</sup> which likely accounts  
255 for the post-weaning enrichment of these ARGs. In *Prevotella* spp. the *bla<sub>CfxA</sub>* genes have been

256 shown to confer resistance to ampicillin but not cefmetazole<sup>47</sup>. The *bla*<sub>ACI-1</sub> gene may be associated  
257 with *M. elsdenii* as has been demonstrated in human gut metagenomes<sup>48</sup>. Overall, these results  
258 again demonstrate the challenges faced when it comes to reducing antimicrobial resistance in  
259 swine as none of the pigs in this study were exposed to antimicrobials.

260 In conclusion, this study shows that weaning age has little effect on the long-term  
261 development and composition of the pig gut microbiome and resistome. Several bacterial species  
262 with potential beneficial properties such as SCFA production were found to be enriched post-  
263 weaning and are attractive targets for future microbiome manipulation and culture-based studies.

## 264 **Materials and methods**

### 265 *Animals and experimental design*

266 All pig experiments were carried out at the swine unit of the Lacombe Research and Development  
267 Centre. Seven pregnant sows that farrowed within 24 h of each other were used in the study. A  
268 total of 45 piglets (n = 15 per weaning age group) were randomly selected for inclusion in the  
269 study based on weight and sex, with low-weight piglets excluded. Following weaning, all pigs  
270 were fed the same starter diet that was free of antibiotics, prebiotics, and probiotics  
271 (Supplementary Table S12). Any pig that required an antibiotic treatment was removed from the  
272 study. Animals in this experiment were cared for in agreement with the Canadian Council for  
273 Animal Care (2009) guidelines. The Lacombe Research and Development Centre Animal Care  
274 Committee reviewed and approved all procedures and protocols involving animals.

275 Piglets were sampled using fecal swabs (FLOQSwabs, Copan, Murrieta, CA, USA)  
276 beginning at 4 days of age and repeated on days 7 and 11. On d 14, 15 piglets were randomly  
277 chosen from among the 7 litters and removed from their sow. These piglets were housed in a  
278 nursery room within the swine barn, placed in 3 separate pens (5 pigs per pen), and constituted the

279 d 14-weaned group. Fecal sampling continued for all piglets at 15, 18, and 21 d of age. On d 21,  
280 another 15 piglets were randomly chosen, removed from their sow, and placed into 3 separate pens  
281 (5 per pen) (d 21-weaned group) within a nursery room. Fecal samples were taken at d 22, 25, and  
282 28, and then the final 15 piglets were weaned from their sow and placed in the nursery room (3  
283 pens of 5 pigs per pen) (d 28-weaned group). All piglets were then sampled on d 29, 32, 25, 42,  
284 49, 56, 70, 84, 112, and 140. All fecal swabs were immediately placed on ice, transported to the  
285 laboratory, and stored at -80°C until DNA extraction.

### 286 ***DNA extraction and 16S rRNA gene and shotgun metagenomic sequencing***

287 DNA was extracted from fecal material collected on FLOQSwabs with the QIAamp  
288 BiOstic Bacteremia DNA Kit (Qiagen, Mississauga, ON, Canada) as per manufacturer's  
289 instructions with the following modifications. Sterile scissors were used to remove the swab which  
290 was then placed into a PowerBead tube with MBL solution and agitated at 70°C and 400 rpm for  
291 15 min. After heating, the tubes were shaken in a FastPrep-24 (MP Biomedicals, Solon, OH, USA)  
292 at 4.0 m/s for 45 s. Tubes were allowed to rest in the MP FastPrep-24 for 5 min. Using sterile  
293 forceps, swabs were removed from PowerBead tubes prior to pelleting debris at 10,000 x g for 2  
294 min. All remaining steps were followed as per the manufacturer's protocol.

295 Extracted bacterial DNA was loaded onto nine 96-well plates and two wells on each plate  
296 included a positive control (MSA-1002, 20 Strain Even Mix Genomic Material, ATCC, Manassas,  
297 VA, USA) and negative control (water). Negative extraction controls were also included. DNA  
298 was quantified and analyzed using the Qubit dsDNA HS Assay Kit (Thermo Fisher Scientific,  
299 Waltham, MA, USA) and Agilent High Sensitivity D1000 ScreenTape System (Santa Clara, CA,  
300 USA). The V4 hypervariable region of the 16S rRNA gene was amplified as per Kozich et al. <sup>49</sup>.  
301 To prepare each 16S rRNA gene library, 5 µl of each sample from three 96-well plates were pooled

302 at a time. The pooled library was normalized to 0.4 nM and submitted to the Genomics Facility in  
303 the Infectious Bacterial Diseases Research Unit at USDA-ARS-NADC in Ames, IA for 250 bp  
304 paired-end sequencing on a MiSeq instrument (Illumina, San Diego, CA) using v2 chemistry.

305 DNA from d 7, 14, 21, 28, 35, 70, and 140 of all pigs that remained in the study through to  
306 d 140 was also subjected to shotgun metagenomic sequencing. Metagenomic libraries were  
307 prepared using 700 ng of DNA and the TruSeq DNA PCR-Free Library Prep Kit (Illumina Inc.)  
308 following the manufacturer's recommended protocol. Briefly, DNA was fragmented to an average  
309 length of 400 bp with a Covaris LE220 instrument, end-repaired, A-tailed, and indexed with  
310 TruSeq Illumina adapters. Libraries were then validated on a Fragment Analyzer system with a  
311 High Sensitivity NGS Fragment Kit (Agilent Technologies, Mississauga, ON, Canada) to check  
312 for size and quantified by qPCR using the Kapa Library Quantification Illumina/ABI Prism Kit  
313 protocol (KAPA Biosystems, Wilmington, MA, USA). Equimolar quantities of each library were  
314 then pooled and sequenced on the Illumina NovaSeq 6000 instrument with a SP flowcell (2 x 250  
315 bp) following manufacturer's instructions.

### 316 *16S rRNA gene sequence analysis*

317 The 16S rRNA were processed using DADA2 v. 1.14<sup>50</sup> in R v. 3.6.3. Briefly, the forward  
318 and reverse reads were trimmed to 200 and 210 bp, respectively, merged with a minimum overlap  
319 of 75 bp, and chimeras removed. The RDP naive Bayesian classifier<sup>51</sup> and the SILVA SSU  
320 database release 138<sup>52</sup> were then used to assign taxonomy to each merged sequence, referred to  
321 here as operational taxonomic units (OTUs) with 100% similarity. OTUs that were classified as  
322 chloroplasts, mitochondria, or eukaryotic in origin, and those that were identified in the extraction  
323 control samples at an equal or higher abundance than the biological samples were removed prior  
324 to analyses. The number of OTUs, Shannon diversity index, inverse Simpson's diversity index,

325 and the Bray-Curtis dissimilarities were calculated in R v. 4.0.0 using Phyloseq 1.32.0<sup>53</sup> and vegan  
326 v. 2-5.6<sup>54</sup>. To account for uneven sequencing depth all samples were randomly subsampled to  
327 6,900 sequences per sample prior to analyses.

### 328 ***Metagenomic sequence analysis***

329 Metagenomic sequences were trimmed (quality score < 15 over a sliding window of 4 bp;  
330 minimum length of 50 bp) and sequencing adapters removed using Trimmomatic v. 0.38<sup>55</sup>.  
331 Bowtie2 v. 2.4.2-1<sup>56</sup> was used to align host sequences to the *Sus scrofa* genome (Sscrofa11.1) for  
332 removal. Taxonomy was assigned to the filtered metagenomic sequences using Kaiju v. 1.7.3<sup>57</sup>  
333 and the NCBI non-redundant protein database (October 13, 2020). For functional profiling of the  
334 metagenomic samples, HUMAnN v. 3.0.0.alpha.1<sup>58</sup> was used to align reads to the UniRef90  
335 database which were then collapsed into MetaCyc metabolic and enzyme pathways<sup>59</sup>. Reads were  
336 aligned to the Comprehensive Antibiotic Resistance Database (CARD) v. 3.0.8<sup>60</sup> and the  
337 Carbohydrate-Active enZymes (CAZy) Database (dbCAN2) v. 07312020<sup>61</sup> using DIAMOND v.  
338 0.9.28<sup>62</sup> ( $\geq 90\%$  amino acid identify and  $\geq 90\%$  coverage). All sequencing data was submitted to  
339 the NCBI sequence read archive under BioProject PRJNA629856.

### 340 ***Statistical analysis***

341 Fisher's exact test was used to determine if weaning age was associated with removal from  
342 the study post-weaning due to antimicrobial treatment or death. The effect of weaning age on the  
343 microbial community structure was assessed using the Bray-Curtis dissimilarities and  
344 PERMANOVA (adonis2 function). The R package pairwiseAdonis<sup>63</sup> was used to compare the  
345 Bray-Curtis dissimilarities within each sampling time and the Benjamini-Hochberg procedure was  
346 used to correct P-values for multiple comparisons. The effect of weaning age on the relative  
347 abundance of microbial species, CAZy families, MetaCyc pathways, and ARGs was determined

348 using MaAsLin2 (microbiome multivariable associations with linear models) v. 1.5.1<sup>64</sup> in R. Only  
349 those microbial species with an average relative abundance of at least 0.1% and CAZy families,  
350 MetaCyc pathways, and ARGs identified in at least 25% of samples were included in these  
351 analyses.

## 352 **Acknowledgements**

353 We thank the animal care staff at the Lacombe Research and Development Centre swine unit for  
354 their assistance and excellent care of the animals. We are also grateful to Cara Service and  
355 TingTing Liu for their valuable technical support. We thank David Alt and Crystal Loving for help  
356 with sequencing and Arun Kommadath for submitting the metagenomic sequences to the SRA.  
357 We also appreciate helpful feedback from Cassidy Klima. This research was supported by Alberta  
358 Agriculture and Forestry grant 2018R009R and also used resources provided by the SciNet project  
359 of the USDA ARS, ARS project number 0500-00093-001-00-D.

360

## 361 **References**

- 362 1. Lalles JP, Bosi P, Smidt H, Stokes CR. Nutritional management of gut health in pigs around  
363 weaning. *Proc Nutr Soc.* 2007; 66:260-8.doi:10.1017/S0029665107005484
- 364 2. Campbell JM, Crenshaw JD, Polo J. The biological stress of early weaned piglets. *J Anim*  
365 *Sci Biotechnol.* 2013; 4:19.doi:10.1186/2049-1891-4-19
- 366 3. Fairbrother JM, Nadeau E, Gyles CL. *Escherichia coli* in postweaning diarrhea in pigs: an  
367 update on bacterial types, pathogenesis, and prevention strategies. *Anim Health Res Rev.* 2005;  
368 6:17-39.doi:10.1079/ahr2005105
- 369 4. Smith AL, Stalder KJ, Serenius TV, Baas TJ, Mabry JW. Effect of weaning age on nursery  
370 pig and sow reproductive performance. *J Swine Health Prod.* 2008; 16:131-7



- 371 5. Chen C, Zhou Y, Fu H, Xiong X, Fang S, Jiang H, et al. Expanded catalog of microbial  
372 genes and metagenome-assembled genomes from the pig gut microbiome. *Nat Commun.* 2021;  
373 12:1106.doi:10.1038/s41467-021-21295-0
- 374 6. Warr A, Affara N, Aken B, Beiki H, Bickhart DM, Billis K, et al. An improved pig  
375 reference genome sequence to enable pig genetics and genomics research. *Gigascience.* 2020;  
376 9:giaa051.doi:10.1093/gigascience/giaa051
- 377 7. Frese SA, Parker K, Calvert CC, Mills DA. Diet shapes the gut microbiome of pigs during  
378 nursing and weaning. *Microbiome.* 2015; 3:28.doi:10.1186/s40168-015-0091-8
- 379 8. Holman DB, Chenier MR. Temporal changes and the effect of subtherapeutic  
380 concentrations of antibiotics in the gut microbiota of swine. *FEMS Microbiol Ecol.* 2014; 90:599-  
381 608.doi:10.1111/1574-6941.12419
- 382 9. Mach N, Berri M, Estelle J, Levenez F, Lemonnier G, Denis C, et al. Early-life  
383 establishment of the swine gut microbiome and impact on host phenotypes. *Environ Microbiol*  
384 *Rep.* 2015; 7:554-69.doi:10.1111/1758-2229.12285
- 385 10. De Rodas B, Youmans BP, Danzeisen JL, Tran H, Johnson TJ. Microbiome profiling of  
386 commercial pigs from farrow to finish. *J Anim Sci.* 2018; 96:1778-94.doi:10.1093/jas/sky109
- 387 11. Meisel JS, Hannigan GD, Tyldsley AS, SanMiguel AJ, Hodkinson BP, Zheng Q, et al. Skin  
388 Microbiome Surveys Are Strongly Influenced by Experimental Design. *J Invest Dermatol.* 2016;  
389 136:947-56.doi:10.1016/j.jid.2016.01.016
- 390 12. Cantarel BL, Lombard V, Henrissat B. Complex carbohydrate utilization by the healthy  
391 human microbiome. *PLoS One.* 2012; 7:e28742.doi:10.1371/journal.pone.0028742

- 392 13. Hamaker BR TY. A perspective on the complexity of dietary fiber structures and their  
393 potential effect on the gut microbiota. *J Mol Biol.* 2014; 426:3838-  
394 50.doi:10.1016/j.jmb.2014.07.028
- 395 14. Gresse R, Chaucheyras-Durand F, Fleury MA, Van de Wiele T, Forano E, Blanquet-Diot  
396 S. Gut Microbiota Dysbiosis in Postweaning Piglets: Understanding the Keys to Health. *Trends*  
397 *Microbiol.* 2017; 25:851-73.doi:10.1016/j.tim.2017.05.004
- 398 15. Massacci FR BM, Lemonnier G, Guettier E, Blanc F, Jardet D, Rossignol MN, Mercat MJ,  
399 Doré J, Lepage P, Rogel-Gaillard C, Estellé J. Late weaning is associated with increased microbial  
400 diversity and *Faecalibacterium prausnitzii* abundance in the fecal microbiota of piglets. *Anim*  
401 *Microbiome.* 2020; 2:1-12.doi:10.1186/s42523-020-0020-4
- 402 16. Nogrsek B, Accetto T, Fanedl L, Avgustin G. Description of a novel pectin-degrading  
403 bacterial species *Prevotella pectinovora* sp. nov., based on its phenotypic and genomic traits. *J*  
404 *Microbiol.* 2015; 53:503-10.doi:10.1007/s12275-015-5142-0
- 405 17. Hayashi H, Shibata K, Sakamoto M, Tomita S, Benno Y. *Prevotella copri* sp. nov. and  
406 *Prevotella stercorea* sp. nov., isolated from human faeces. *Int J Syst Evol Microbiol.* 2007; 57:941-  
407 6.doi:10.1099/ijs.0.64778-0
- 408 18. Wylensek D, Hitch TCA, Riedel T, Afrizal A, Kumar N, Wortmann E, et al. A collection  
409 of bacterial isolates from the pig intestine reveals functional and taxonomic diversity. *Nat*  
410 *Commun.* 2020; 11:6389.doi:10.1038/s41467-020-19929-w
- 411 19. Trachsel J, Humphrey S, Allen HK. *Butyricoccus porcorum* sp. nov., a butyrate-  
412 producing bacterium from swine intestinal tract. *Int J Syst Evol Microbiol.* 2018; 68:1737-  
413 42.doi:10.1099/ijsem.0.002738

- 414 20. Zhang K, Dong X. *Selenomonas bovis* sp. nov., isolated from yak rumen contents. Int J  
415 Syst Evol Microbiol. 2009; 59:2080-3.doi:10.1099/ijs.0.007641-0
- 416 21. Levine UY, Looft T, Allen HK, Stanton TB. Butyrate-producing bacteria, including mucin  
417 degraders, from the swine intestinal tract. Appl Environ Microbiol. 2013; 79:3879-  
418 81.doi:10.1128/AEM.00589-13
- 419 22. Haenen D, Zhang J, Souza da Silva C, Bosch G, van der Meer IM, van Arkel J, et al. A  
420 diet high in resistant starch modulates microbiota composition, SCFA concentrations, and gene  
421 expression in pig intestine. J Nutr. 2013; 143:274-83.doi:10.3945/jn.112.169672
- 422 23. Rivière A SM, Lantin D, Leroy F, De Vuyst L. Bifidobacteria and butyrate-producing  
423 colon bacteria: importance and strategies for their stimulation in the human gut. Front Microbiol.  
424 2016; 7:979.doi:10.3389/fmicb.2016.00979
- 425 24. Iyayi EA, Adeola O. Quantification of short-chain fatty acids and energy production from  
426 hindgut fermentation in cannulated pigs fed graded levels of wheat bran. J Anim Sci. 2015;  
427 93:4781-7.doi:10.2527/jas.2015-9081
- 428 25. Jørgensen H LT, Zhao XQ, Eggum BO. The energy value of short-chain fatty acids infused  
429 into the caecum of pigs. Br J Nutr. 1997; 77:745-56.doi:10.1079/bjn19970072
- 430 26. Karasova D CM, Babak V, Jerabek M, Brzobohaty L, Matesova Z, Rychlik I. Development  
431 of piglet gut microbiota at the time of weaning influences development of postweaning diarrhea–  
432 A field study. Res Vet Sci. 2021; 135:59-65.doi:10.1016/j.rvsc.2020.12.022
- 433 27. Quan J, Wu Z, Ye Y, Peng L, Wu J, Ruan D, et al. Metagenomic Characterization of  
434 Intestinal Regions in Pigs With Contrasting Feed Efficiency. Front Microbiol. 2020;  
435 11:32.doi:10.3389/fmicb.2020.00032

- 436 28. Eeckhaut V, Wang J, Van Parys A, Haesebrouck F, Joossens M, Falony G, et al. The  
437 Probiotic *Butyricoccus pullicaecorum* Reduces Feed Conversion and Protects from Potentially  
438 Harmful Intestinal Microorganisms and Necrotic Enteritis in Broilers. *Front Microbiol.* 2016;  
439 7:1416.doi:10.3389/fmicb.2016.01416
- 440 29. Martin R, Miquel S, Chain F, Natividad JM, Jury J, Lu J, et al. *Faecalibacterium*  
441 *prausnitzii* prevents physiological damages in a chronic low-grade inflammation murine model.  
442 *BMC Microbiol.* 2015; 15:67.doi:10.1186/s12866-015-0400-1
- 443 30. Gebhardt JT, Tokach MD, Dritz SS, DeRouchey JM, Woodworth JC, Goodband RD, et al.  
444 Postweaning mortality in commercial swine production II: review of infectious contributing  
445 factors. *Transl Anim Sci.* 2020; 4:txaa052.doi:10.1093/tas/txaa052
- 446 31. Wang J, Ji H, Hou C, Wang S, Zhang D, Liu H, et al. Effects of *Lactobacillus johnsonii*  
447 XS4 supplementation on reproductive performance, gut environment, and blood biochemical and  
448 immunological index in lactating sows. *Livest Sci.* 2014; 164:96-  
449 101.doi:doi.org/10.1016/j.livsci.2014.03.008
- 450 32. Xin J, Zeng D, Wang H, Sun N, Zhao Y, Dan Y, et al. Probiotic *Lactobacillus johnsonii*  
451 BS15 Promotes Growth Performance, Intestinal Immunity, and Gut Microbiota in Piglets.  
452 *Probiotics Antimicrob Proteins.* 2020; 12:184-93.doi:10.1007/s12602-018-9511-y
- 453 33. Holman DB, Brunelle BW, Trachsel J, Allen HK. Meta-analysis To Define a Core  
454 Microbiota in the Swine Gut. *mSystems.* 2017; 2.doi:10.1128/mSystems.00004-17
- 455 34. Wei J WZ, Wang B, Jahan M, Wang Z, Wynn PC, Du Y. Characterization of porcine milk  
456 oligosaccharides over lactation between primiparous and multiparous female pigs. *Sci Rep.* 2018;  
457 8:1-16.doi:10.1038/s41598-018-23025-x

- 458 35. Salcedo J FS, Mills DA, Barile D. Characterization of porcine milk oligosaccharides during  
459 early lactation and their relation to the fecal microbiome. *J Dairy Sci.* 2016; 99:7733-  
460 43.doi:10.3168/jds.2016-10966
- 461 36. Difilippo E, Pan F, Logtenberg M, Willems RH, Braber S, Fink-Gremmels J, et al. Milk  
462 Oligosaccharide Variation in Sow Milk and Milk Oligosaccharide Fermentation in Piglet Intestine.  
463 *J Agric Food Chem.* 2016; 64:2087-93.doi:10.1021/acs.jafc.6b00497
- 464 37. Difilippo E PF, Logtenberg M, Willems RH, Braber S, Fink-Gremmels J, Schols HA,  
465 Gruppen H. In vitro fermentation of porcine milk oligosaccharides and galacto-oligosaccharides  
466 using piglet fecal inoculum. *J Agric Food Chem.* 2016; 64:2127-33.doi:10.1021/acs.jafc.5b05384
- 467 38. Marcobal A, Barboza M, Froehlich JW, Block DE, German JB, Lebrilla CB, et al.  
468 Consumption of human milk oligosaccharides by gut-related microbes. *J Agric Food Chem.* 2010;  
469 58:5334-40.doi:10.1021/jf9044205
- 470 39. Marcobal A, Sonnenburg JL. Human milk oligosaccharide consumption by intestinal  
471 microbiota. *Clin Microbiol Infect.* 2012; 18 Suppl 4:12-5.doi:10.1111/j.1469-0691.2012.03863.x
- 472 40. Charbonneau MR, O'Donnell D, Blanton LV, Totten SM, Davis JC, Barratt MJ, et al.  
473 Sialylated Milk Oligosaccharides Promote Microbiota-Dependent Growth in Models of Infant  
474 Undernutrition. *Cell.* 2016; 164:859-71.doi:10.1016/j.cell.2016.01.024
- 475 41. Canada PHAo. Canadian Integrated Program for Antimicrobial Resistance Surveillance  
476 (CIPARS): 2018 Integrated Findings. 2020.
- 477 42. USDA-APHIS-NAHMS. Antimicrobial Use and Stewardship on U.S. Swine Operations.  
478 2017. 2020

- 479 43. Pollock J, Muwonge A, Hutchings MR, Mainda G, Bronsvort BM, Gally DL, et al.  
480 Resistance to change: AMR gene dynamics on a commercial pig farm with high antimicrobial  
481 usage. *Sci Rep.* 2020; 10:1708.doi:10.1038/s41598-020-58659-3
- 482 44. Holman DB BB, Allen HK, Shippy DC, Loving CL, Kerr BJ, Bearson SMD, Brunelle BW.  
483 Chlortetracycline enhances tonsil colonization and fecal shedding of multidrug-resistant  
484 *Salmonella enterica* serovar Typhimurium DT104 without major alterations to the porcine tonsillar  
485 and intestinal microbiota. *Appl Environ Microbiol.* 2019; 85:e02354-18.doi:10.1128/AEM.02354-  
486 18
- 487 45. Roberts MC, Schwarz S. Tetracycline and chloramphenicol resistance mechanisms.  
488 *Antimicrobial drug resistance: Springer,* 2017:231-43.
- 489 46. Binta B, Patel M. Detection of *cfxA2*, *cfxA3*, and *cfxA6* genes in beta-lactamase producing  
490 oral anaerobes. *J Appl Oral Sci.* 2016; 24:142-7.doi:10.1590/1678-775720150469
- 491 47. Tran CM, Tanaka K, Watanabe K. PCR-based detection of resistance genes in anaerobic  
492 bacteria isolated from intra-abdominal infections. *J Infect Chemother.* 2013; 19:279-  
493 90.doi:10.1007/s10156-012-0532-2
- 494 48. Rands CM SE, Brüssow H, Kriventseva EV, Govorun VM, Zdobnov EM. ACI-1 beta-  
495 lactamase is widespread across human gut microbiomes in Negativicutes due to transposons  
496 harboured by tailed prophages. *Environ Microbiol.* 2018; 20:2288-300.doi:10.1111/1462-  
497 2920.14276
- 498 49. Kozich JJ, Westcott SL, Baxter NT, Highlander SK, Schloss PD. Development of a dual-  
499 index sequencing strategy and curation pipeline for analyzing amplicon sequence data on the  
500 MiSeq Illumina sequencing platform. *Appl Environ Microbiol.* 2013; 79:5112-  
501 20.doi:10.1128/AEM.01043-13

- 502 50. Callahan BJ, McMurdie PJ, Rosen MJ, Han AW, Johnson AJ, Holmes SP. DADA2: High-  
503 resolution sample inference from Illumina amplicon data. *Nat Methods*. 2016; 13:581-  
504 3.doi:10.1038/nmeth.3869
- 505 51. Wang Q GG, Tiedje JM, Cole JR. Naive Bayesian classifier for rapid assignment of rRNA  
506 sequences into the new bacterial taxonomy. *Appl Environ Microbiol*. 2007; 73:5261-  
507 7.doi:10.1128/AEM.00062-07
- 508 52. Quast C, Pruesse E, Yilmaz P, Gerken J, Schweer T, Yarza P, et al. The SILVA ribosomal  
509 RNA gene database project: improved data processing and web-based tools. *Nucleic Acids Res*.  
510 2013; 41:D590-6.doi:10.1093/nar/gks1219
- 511 53. McMurdie PJ, Holmes S. phyloseq: an R package for reproducible interactive analysis and  
512 graphics of microbiome census data. *PLoS One*. 2013;  
513 8:e61217.doi:10.1371/journal.pone.0061217
- 514 54. Oksanen J, Blanchet FG, Kindt R, Legendre P, Minchin PR, O'hara R, et al. Package  
515 'vegan'. 2013; 2:1-295
- 516 55. Bolger AM, Lohse M, Usadel B. Trimmomatic: a flexible trimmer for Illumina sequence  
517 data. *Bioinformatics*. 2014; 30:2114-20.doi:10.1093/bioinformatics/btu170
- 518 56. Langmead B, Salzberg SL. Fast gapped-read alignment with Bowtie 2. *Nat Methods*. 2012;  
519 9:357-9.doi:10.1038/nmeth.1923
- 520 57. Menzel P, Ng KL, Krogh A. Fast and sensitive taxonomic classification for metagenomics  
521 with Kaiju. *Nat Commun*. 2016; 7:11257.doi:10.1038/ncomms11257
- 522 58. Franzosa EA, McIver LJ, Rahnavard G, Thompson LR, Schirmer M, Weingart G, et al.  
523 Species-level functional profiling of metagenomes and metatranscriptomes. *Nat Methods*. 2018;  
524 15:962-8.doi:10.1038/s41592-018-0176-y

- 525 59. Caspi R, Billington R, Keseler IM, Kothari A, Krummenacker M, Midford PE, et al. The  
526 MetaCyc database of metabolic pathways and enzymes - a 2019 update. *Nucleic Acids Res.* 2020;  
527 48:D445-D53.doi:10.1093/nar/gkz862
- 528 60. Alcock BP, Raphenya AR, Lau TTY, Tsang KK, Bouchard M, Edalatmand A, et al. CARD  
529 2020: antibiotic resistome surveillance with the comprehensive antibiotic resistance database.  
530 *Nucleic Acids Res.* 2020; 48:D517-D25.doi:10.1093/nar/gkz935
- 531 61. Zhang H, Yohe T, Huang L, Entwistle S, Wu P, Yang Z, et al. dbCAN2: a meta server for  
532 automated carbohydrate-active enzyme annotation. *Nucleic Acids Res.* 2018; 46:W95-  
533 W101.doi:10.1093/nar/gky418
- 534 62. Buchfink B XC, Huson DH. Fast and sensitive protein alignment using DIAMOND. *Nat*  
535 *Methods.* 2015; 12:59-60.doi:10.1038/nmeth.3176
- 536 63. Arbizu M. Pairwise multilevel comparison using adonis. R package version 04. 2021
- 537 64. Mallick H, Rahnavard A, McIver LJ, Ma S, Zhang Y, Nguyen LH, et al. Multivariable  
538 Association Discovery in Population-scale Meta-omics Studies.  
539 2021:2021.01.20.427420.doi:10.1101/2021.01.20.427420 %J bioRxiv

540

## 541 **Figure Legends**

542 **Figure 1.** Average daily gain in kg of pigs by weaning age within each weighing period. Different  
543 lowercase letters indicate significantly different means ( $P < 0.05$ ).

544 **Figure 2.** Non-metric multidimensional scaling plot of the Bray-Curtis dissimilarities for the pig  
545 fecal microbiota by weaning age and sampling day based on 16S rRNA gene sequencing.

546 **Figure 3.** The A) number of OTUs and B) Shannon diversity index values based on 16S rRNA  
547 gene sequencing and C) the 15 most relatively-abundant bacterial species based on shotgun



548 metagenomic sequencing for the pig fecal microbiome by weaning age and sampling day . In A  
549 and B, different lowercase letters indicate significantly different means ( $P < 0.05$ ). In C, species  
550 are ordered by overall percent relative abundance.

551 **Figure 4.** Non-metric multidimensional scaling plot of the Bray-Curtis dissimilarities for the A)  
552 CAZymes and B) MetaCyc metabolic pathways of the pig fecal microbiome and C) percent  
553 relative abundance of CAZyme classes by weaning age and sampling day.

554 **Figure 5.** Non-metric multidimensional scaling plot of the Bray-Curtis dissimilarities for the A)  
555 antimicrobial resistance genes and B) percent relative abundance of antimicrobial resistance  
556 genes by antimicrobial class by weaning age and sampling day.

557 **Supplementary figure S1.** Non-metric multidimensional scaling plot of the Bray-Curtis  
558 dissimilarities for the fecal microbiota by weaning age and age of piglets.

559

560

Figure 1.

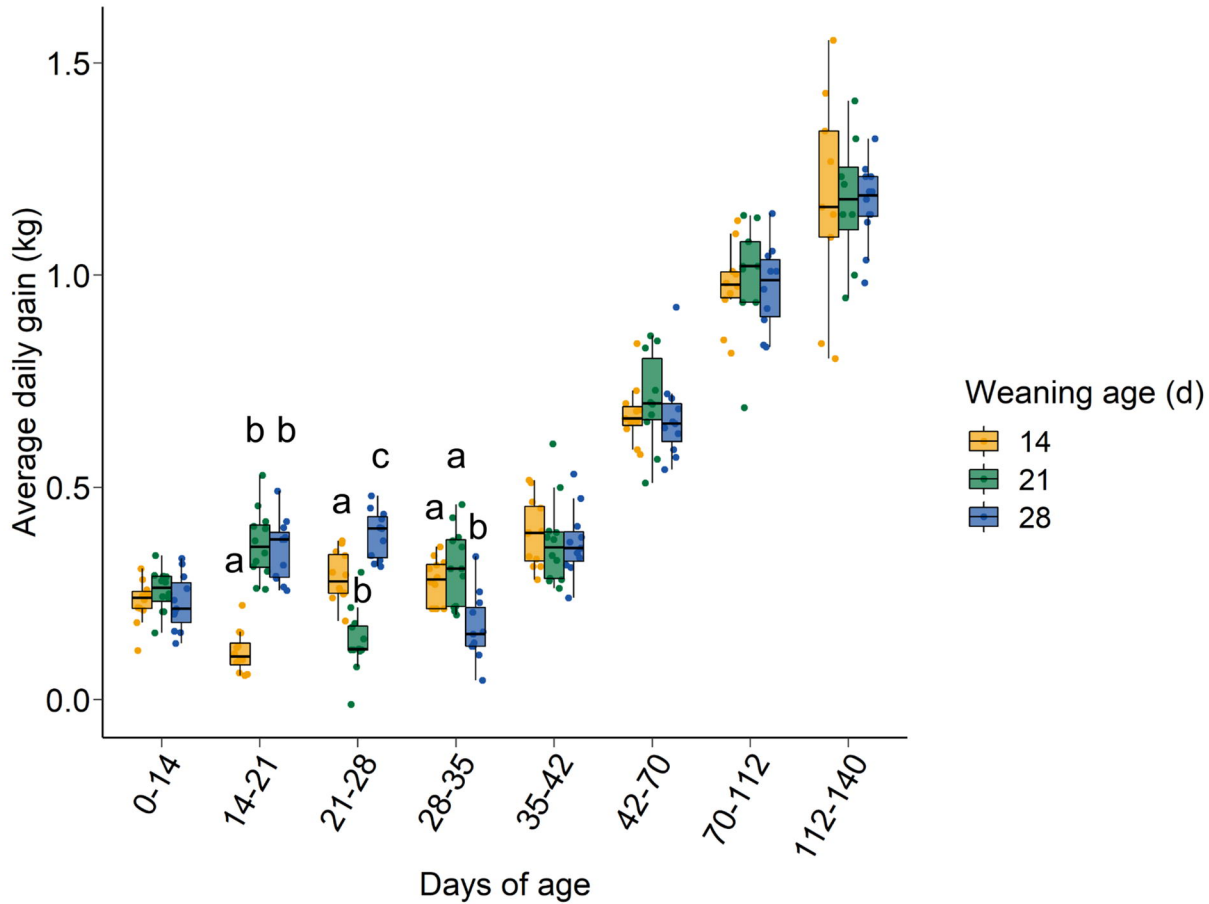

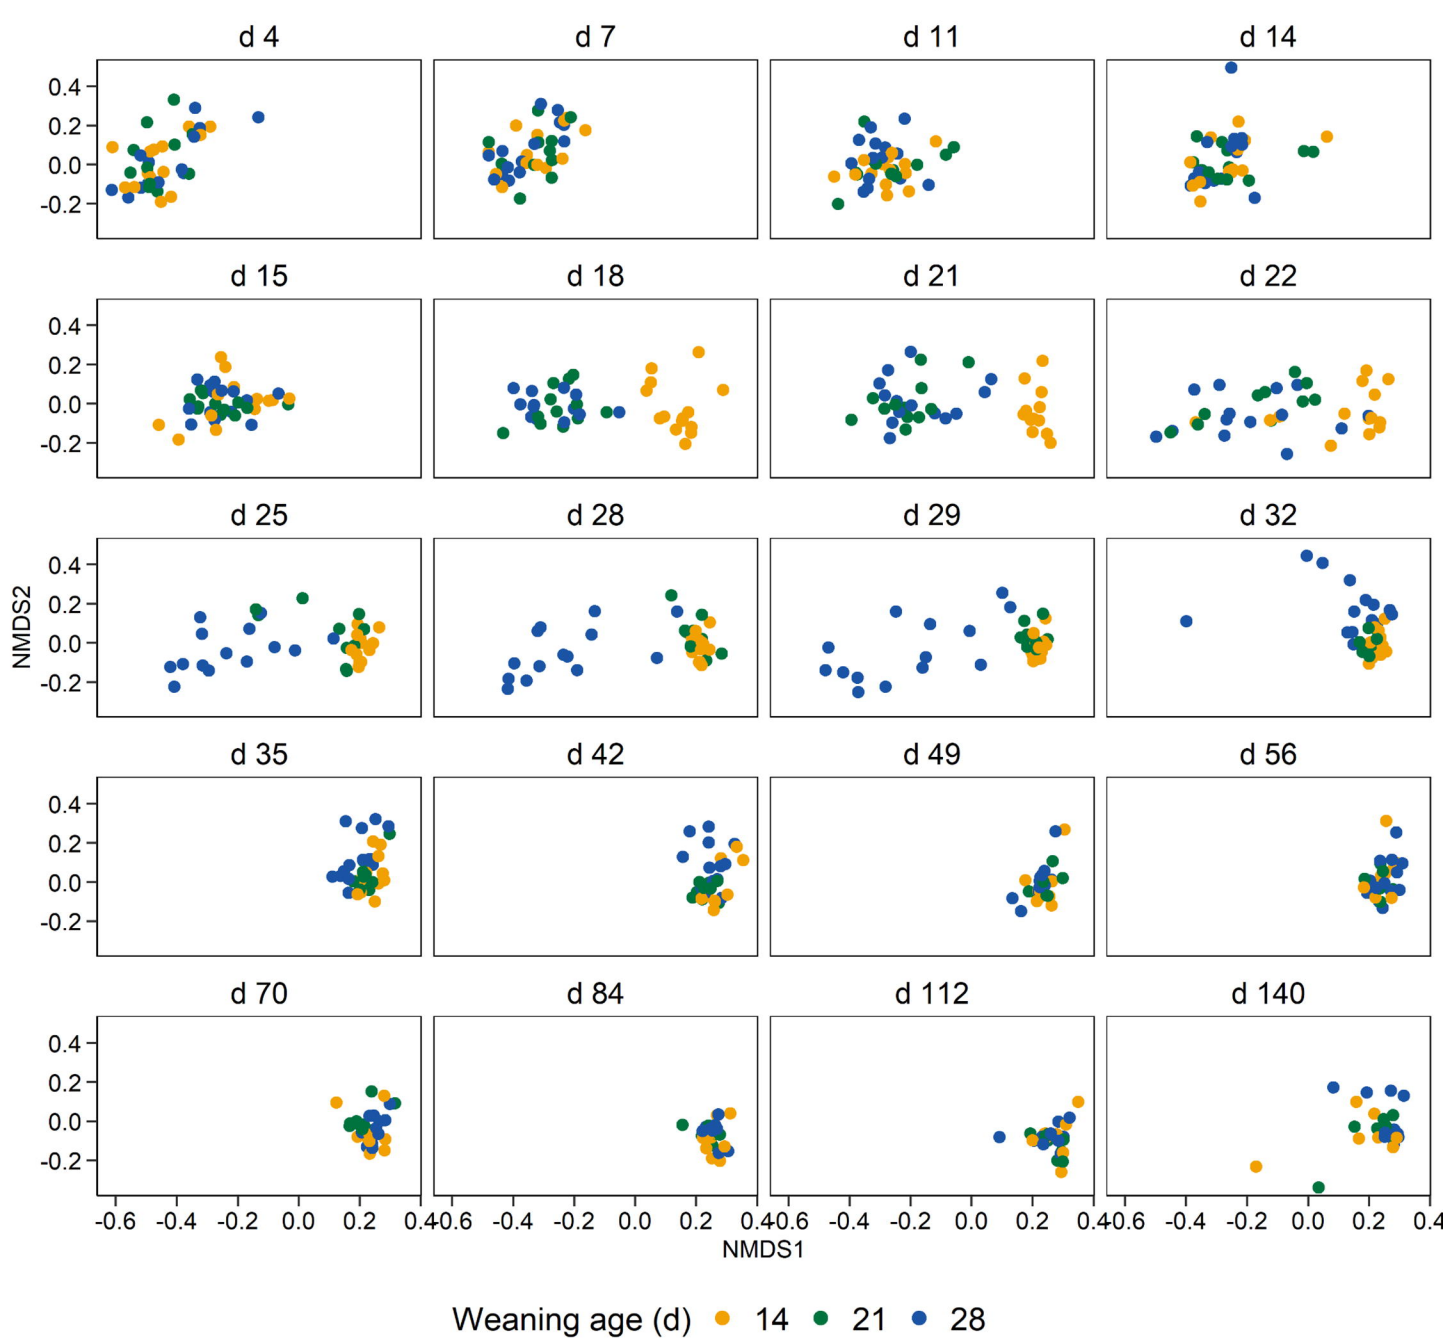

Figure 3.

A

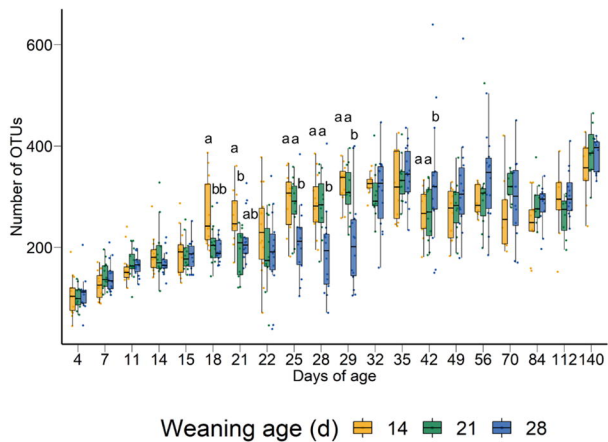

B

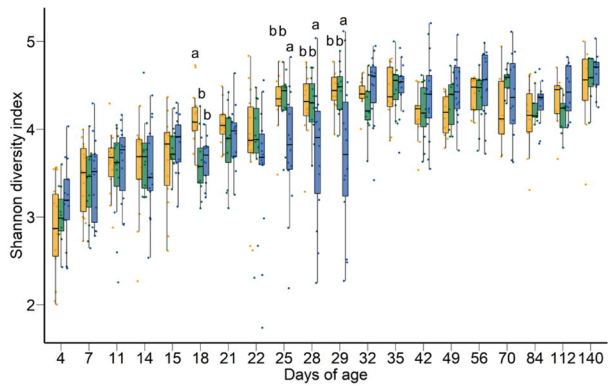

C

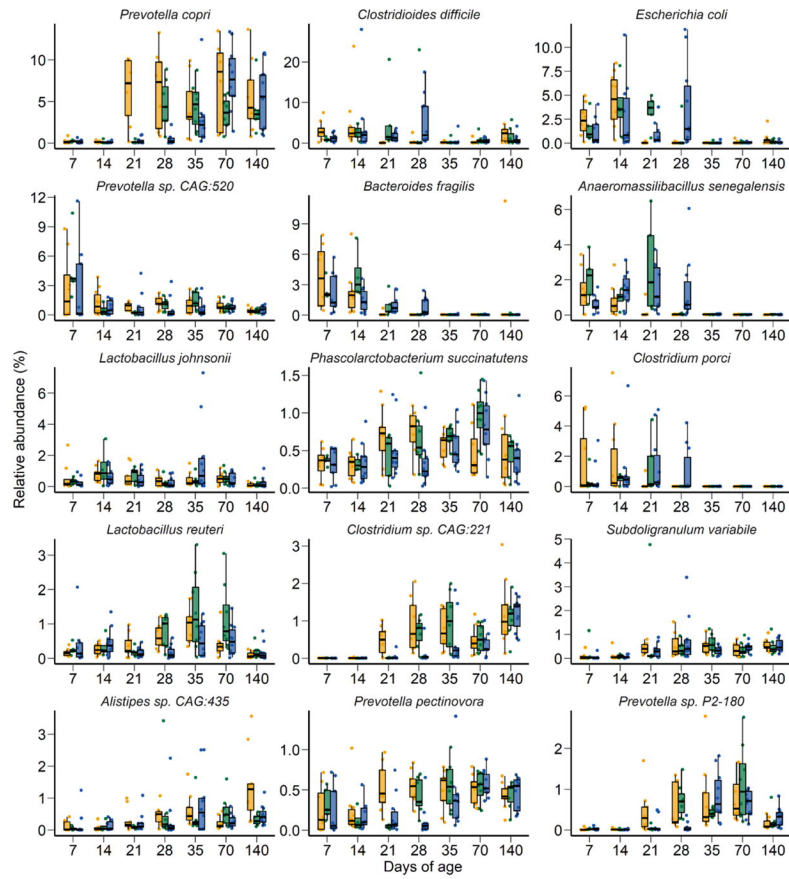

Figure 4.

A

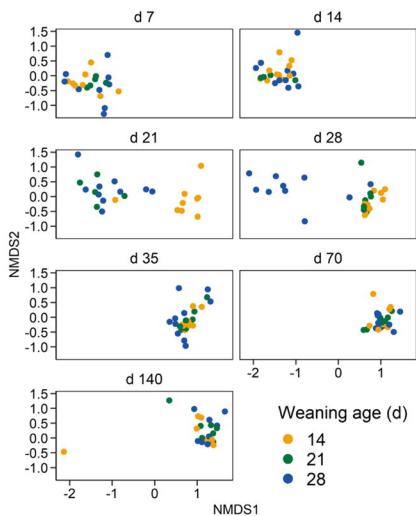

B

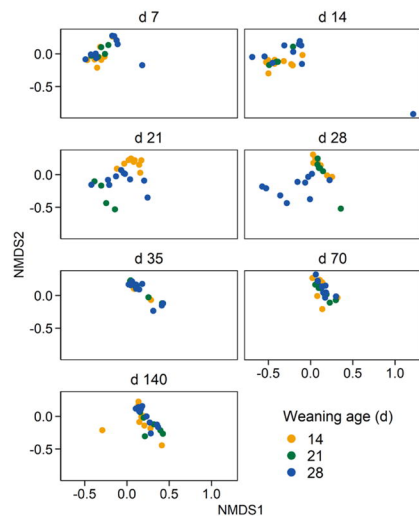

C

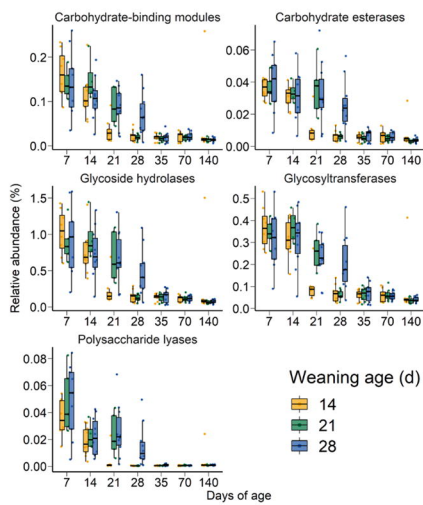

Figure 5.

A

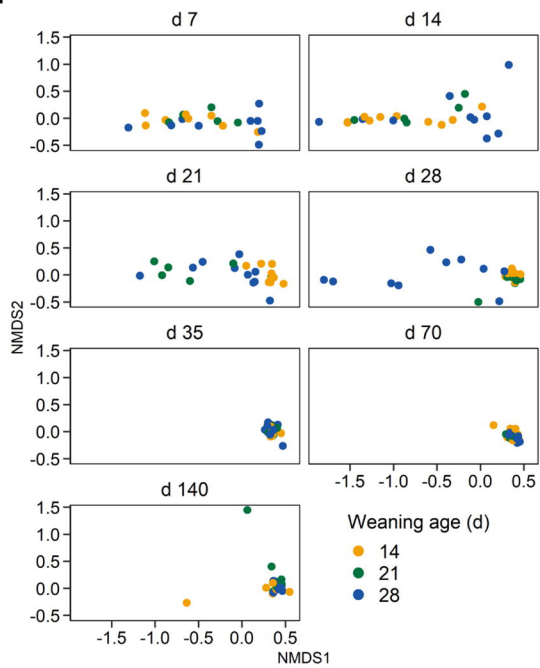

B

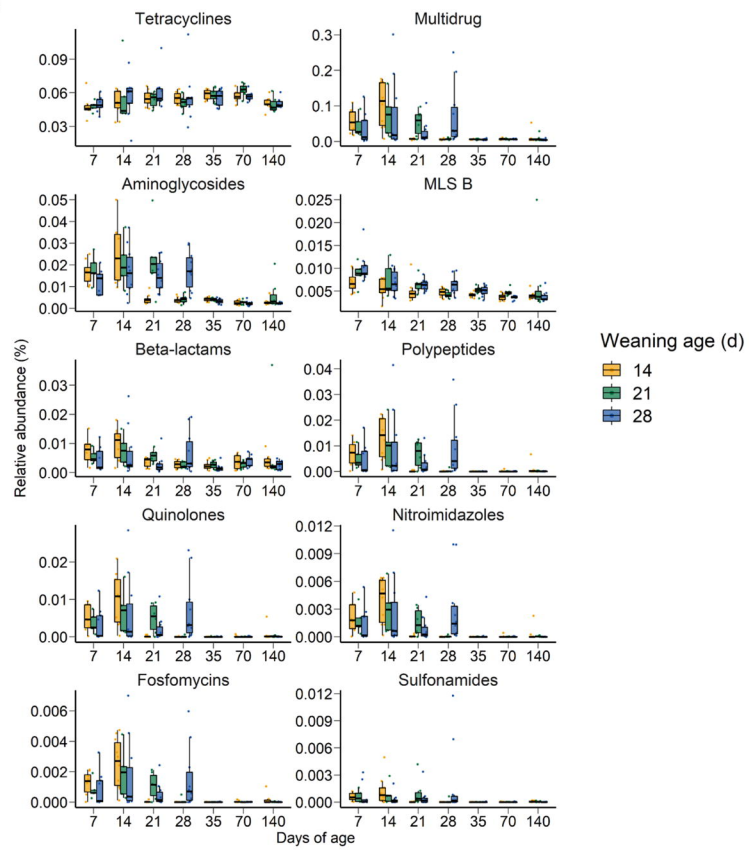

Source: http://biorxiv.org/content/10.1101/2021.05.20.444551v1.full.pdf
