1 **Weaning age and its effect on the development of the swine gut microbiome and resistome**

2 Devin B Holman<sup>1\*</sup>, Katherine E. Gzyl<sup>1</sup>, Kathy T. Mou<sup>2</sup>, Heather K. Allen<sup>2</sup>

3

4 <sup>1</sup>Lacombe Research and Development Centre, Agriculture and Agri-Food Canada, 6000 C and E

5 Trail, Lacombe, Alberta, Canada T4L 1W1

6 <sup>1</sup>USDA, ARS, National Animal Disease Center, 1920 Dayton Ave., Ames, IA, USA 50010

7

8 \*Corresponding Author: Devin B. Holman [devin.holman@agr.gc.ca](mailto:devin.holman@agr.gc.ca)

9

10

11

12

13

14

15

16

17

18

19

20

21

22

23

24

25 **Keywords:** swine, microbiome, metagenomics, resistome, weaning, CAZymes

## 26 **Abstract**

27 Piglets are often weaned between 19 and 22 d of age in North America although in some swine  
28 operations this may occur at 14 d or less. Piglets are abruptly separated from their sow at  
29 weaning and are quickly transitioned from sow's milk to a plant-based diet. The effect of  
30 weaning age on the long-term development of the pig gut microbiome is largely unknown. Here,  
31 pigs were weaned at either 14, 21, or 28 d of age and fecal samples collected 20 times from d 4  
32 (neonatal) through to marketing at d 140. The fecal microbiome was characterized using 16S  
33 rRNA gene and shotgun metagenomic sequencing. The fecal microbiome of all piglets shifted  
34 significantly three to seven days post-weaning with an increase in microbial diversity. Several  
35 *Prevotella* spp. increased in relative abundance immediately after weaning as did butyrate-  
36 producing species such as *Butyricoccus porcorum*, *Faecalibacterium prausnitzii*, and  
37 *Megasphaera elsdenii*. Within 7 days of weaning, the gut microbiome of pigs weaned at 21 and  
38 28 days of age resembled that of pigs weaned at 14 d. Resistance genes to most antimicrobial  
39 classes decreased in relative abundance post-weaning with the exception of those conferring  
40 resistance to tetracyclines and macrolides-lincosamides-streptogramin B. The relative abundance  
41 of microbial carbohydrate-active enzymes (CAZymes) changed significantly in the post-weaning  
42 period with an enrichment of CAZymes involved in degradation of plant-derived  
43 polysaccharides. These results demonstrate that the pig gut microbiome tends change in a  
44 predictable manner post-weaning and that weaning age has only a temporary effect on this  
45 microbiome.

## 46 **Importance**

47 Piglets are abruptly separated from their sow at weaning and are quickly transitioned from sow's  
48 milk to a plant-based diet. This is the most important period in commercial swine production yet

49 the effect of weaning age on the long-term development of the pig gut microbiome is largely  
50 unknown. Metagenomic sequencing allows for a higher resolution assessment of the pig gut  
51 microbiome and enables characterization of the resistome. Here we used metagenomic  
52 sequencing to identify bacterial species that were enriched post-weaning and therefore may  
53 provide targets for future manipulation studies. In addition, functional profiling of the  
54 microbiome indicated that many carbohydrate and metabolic enzymes decrease in relative  
55 abundance of after weaning. This study also highlights the challenges faced in reducing  
56 antimicrobial resistance in pigs as genes conferring tetracycline and macrolide resistance  
57 remained relatively stable from 7 days of age through to market weight at 140 d despite no  
58 exposure to antimicrobials.

## 59 **Introduction**

60 In commercial swine production, the suckling-weaning transition is the most critical period for  
61 piglet health. When piglets are weaned they are abruptly separated from their sow and their diet  
62 is changed from an easily digestible milk-based one to a more complex plant-based diet. The risk  
63 of developing health problems is increased as piglets are subjected to stress as a result of mixing  
64 with unfamiliar piglets, handling, and separation from the sow (1). This stress frequently leads to  
65 reduced feed intake immediately following weaning which negatively affects growth  
66 performance (2). Consequently, newly weaned piglets frequently develop post-weaning diarrhea,  
67 resulting in significant economic losses due to associated piglet morbidity, mortality, and  
68 treatment (3). Weaning times vary but piglets can be weaned as young as 14 d or less in some in  
69 North American commercial swine operations. Earlier weaning ages allow for a greater number  
70 of piglets weaned per sow per year and may also decrease the risk of transmission of certain

71 pathogens from the sow to piglets. However, piglets that are weaned relatively early may be  
72 more susceptible to disease and other complications (4).

73 As with humans and other mammals, the gut microbiome is an important factor affecting  
74 swine health. There are an estimated 17 million plus microbial genes in the pig gut microbiome  
75 (5) compared to 20,000 to 25,000 genes in the swine genome (6). This greatly expands the  
76 genetic potential of the host, particularly as certain microbes can metabolize otherwise non-  
77 digestible dietary carbohydrates into a usable energy source. It has been well documented that  
78 the pig gut microbiome undergoes a rapid shift following weaning including a decrease in  
79 members of the Proteobacteria phylum and *Bacteroides* genus and an increase in genera such as  
80 *Prevotella*, *Roseburia*, and *Succinivibrio* (7-10). However, relatively little is known about how  
81 weaning age affects the short- and long-term development of the pig gut microbiome. In this  
82 study, we weaned pigs at three different ages, 14, 21, and 28 days, and collected fecal samples 20  
83 times from the neonatal stage until they reached market weight. The fecal microbiome and  
84 resistome were assessed using 16S rRNA gene and shotgun metagenomic sequencing to  
85 determine how weaning age affected both over the course of the swine production cycle.

## 86 **Results**

### 87 *Effect of weaning age on pig performance*

88 As expected, all pigs gained less weight in the 7 d post-weaning period compared to pigs  
89 that were either still nursing or had already been on solid feed for longer than 7 d (Fig. 1). From  
90 d 35 onward pigs from all weaning age groups grew at the same rate. There was also no  
91 association with weaning age and a pig being removed from the study due to antimicrobial  
92 treatment or death ( $P > 0.05$ ).

### 93 *Sequencing*

94 The 16S rRNA gene sequencing of the mock community reflected the expected  
95 composition with minor exceptions. There was a larger than expected relative abundance of  
96 *Clostridium* (Table S1) and an absence of *Cutibacterium acnes* (formerly *Propionibacterium*  
97 *acnes*); however, this species is known to be poorly amplified by the primers used in this study  
98 (11). After processing, there were  $35,448 \pm 1,247$  SEM 16S rRNA gene sequences and  
99  $16,699,263 \pm 680,292$  shotgun metagenomic paired-end sequences per sample. For the  
100 metagenomic samples, host contamination accounted for  $42.3\% \pm 2.0\%$  of the sequences.

### 101 ***Weaning age and the development of the gut microbiome***

102 Weaning age had a strong but temporary effect on the gut microbial community structure  
103 (Fig. 2; S2; Fig. S1). Within three days of weaning (d 18), the d 14-weaned pigs had a gut  
104 microbiota that was significantly different from that of the pigs that were still nursing  
105 (PERMANOVA:  $R^2 > 0.25$ .  $P < 0.001$ ). By 25 days of age, the gut microbiota of piglets weaned  
106 on d 21 was significantly different from that of both the d 14- and d 28-weaned groups  
107 (PERMANOVA:  $R^2 \geq 0.13$ .  $P < 0.001$ ). However, on d 28, the d 14- and d 21-weaned piglets  
108 largely clustered together and separately from the d 28-weaned piglets which were still nursing  
109 up to that point. Interestingly, the gut microbial community structure of piglets weaned at 28  
110 days of age remained significantly different from that of the d 14-weaned pigs at d 35 and from  
111 the d 21-weaned pigs until and including d 42.

112 There was an increase in richness (number of OTUs) and diversity (Shannon diversity  
113 index) four days post-weaning in the d 14-weaned piglets compared to the still-nursing piglets  
114 (Fig. 3A, B). Similarly, from d 25 to 29, both the d 14- and d 21-weaned piglets had greater  
115 diversity and richness than the still-nursing d 28-weaned group. These differences had  
116 disappeared by d 32, and with the exception of d 42 when the d 28-weaned piglets had a richer

117 microbiota than the other two groups, the diversity of the piglet gut microbiota was not affected  
118 by age at weaning. Based on the shotgun metagenomic sequencing analysis, the shifts observed  
119 in the gut microbiome post-weaning were associated with a number of different bacterial species  
120 (Fig. 3C; see tables S3 and S4 at <https://doi.org/10.6084/m9.figshare.c.5619817.v1>). Among  
121 those that increased in relative abundance post-weaning were several *Prevotella* spp. including  
122 *Prevotella copri*, *Prevotella pectinovora*, *Prevotella* sp. P2-180, *Prevotella* sp. P3-122, and  
123 *Prevotella stercorea*. *Butyricicoccus porcorum*, *Faecalibacterium prausnitzii*, *Selenomonas*  
124 *bovis*, and *Treponema porcinum* were also among those significantly enriched in pigs that had  
125 been weaned at either d 14 or 21 compared to piglets that were not weaned until d 28 ( $P < 0.05$ ).

126 Bacterial species that were consistently associated with nursing pigs included  
127 *Anaeromassilibacillus senegalensis*, *Bacteroides fragilis*, *Clostridioides difficile*, *Clostridium*  
128 *porci*, *Clostridium scindens*, *Desulfovibrio piger*, *Escherichia coli*, *Phocaeicola vulgatus*, and  
129 *Shigella sonnei* (Table S4). At 35 days of age, only three bacterial species were differentially  
130 relatively abundant between the d 14- and d 21-weaned pigs and those weaned on d 28:  
131 *Bariatricus massiliensis*, *B. porcorum*, and *D. piger*, all of which were enriched in the d 14-  
132 weaned pigs (Table S4). Once the pigs had reached 70 days of age, there were no bacterial  
133 species with a relative abundance greater than 0.1% that differed among the groups ( $P > 0.05$ ).

#### 134 ***Functional changes in the microbiome post-weaning***

135 Functional profiling of the gut microbiome was carried out using the MetaCyc metabolic  
136 pathway database and the CAZy database of carbohydrate-active enzymes (CAZymes). The  
137 relative abundance of the CAZymes and MetaCyc pathways shifted in a similar way to the  
138 microbial taxa post-weaning (Fig. 4A, B). The CAZymes are grouped into the following classes:  
139 auxiliary activities (AAs), carbohydrate esterases (CEs), glycoside hydrolases (GHs),

140 glycosyltransferases (GTs), polysaccharide lyases (PLs), and carbohydrate-binding modules  
141 (CBMs) which have no enzymatic activity but aid and enhance the catalytic activity of other  
142 CAZymes. In total, 237 CAZy families were detected among all samples (Table S5) in  
143 comparison with only 61 found within the pig genome (Table S6). All of the CAZyme classes  
144 decreased in relative abundance after weaning (Fig. 4C). Overall, 61.5% of the CAZymes were  
145 classified as glycoside hydrolases and 24.7% as glycosyltransferases. However, there were still a  
146 number of CAZy families that were enriched in the gut microbiomes of post-weaned pigs  
147 compared to those still nursing (Table S7). The only AA identified was AA10 (copper-dependent  
148 lytic polysaccharide monooxygenases) and in only 35 of the samples (Table S5).

149         At 21 days of age, there were 141 unique CAZy families that were differentially  
150 abundant between the d 14-weaned pigs and the d 21- and 28-weaned piglets that were still  
151 nursing ( $P < 0.05$ ; Table S7). Similarly, at 28 days of age, 134 CAZy families were differentially  
152 abundant between the still nursing d 28-weaned piglets and the post-weaned d 14- and d 21-  
153 weaned pigs ( $p < 0.05$ ; Table S7). There were no differences in CAZy family relative abundance  
154 among the three weaning age groups by d 35 ( $P > 0.05$ ). Many of the alterations in the CAZyme  
155 profiles post-weaning reflect the change in diet with CAZy families with lactose-degradation  
156 activity (GH2 and GH42) and activity against other components of porcine milk oligosaccharides  
157 (PMOs) (GH16, GH18, GH20, GH29, GH30, GH35, GH95, GH139, and GH141) enriched in  
158 pigs that were nursing compared to those that had been weaned. Meanwhile, CAZy families  
159 including CBMs with mannan- pectin-, starch-, and xylan-binding functions (CBM23, CBM25  
160 CBM26, and CBM77) and GHs with activity against plant cell carbohydrates (GH5, GH39,  
161 GH48, GH53, GH93, and GH94) (12, 13), were more relatively abundant in post-weaned pigs  
162 that were consuming only a plant-based solid feed.

163 A large number of MetaCyc metabolic pathways were also differentially abundant  
164 between weaned and nursing piglets at d 21 (196 unique pathways) and d 28 (231 unique  
165 pathways) with the majority enriched in the gut microbiome of nursing piglets (see Tables S8  
166 and S9 at <https://doi.org/10.6084/m9.figshare.c.5619817.v1>). As with the CAZymes there was an  
167 enrichment of MetaCyc pathways involved in fucose and lactose degradation in the nursing  
168 piglets and an increased relative abundance of certain starch degradation pathways post-weaning.

### 169 ***Weaning age and the gut resistome***

170 Antimicrobial resistance remains a serious challenge to the swine industry and therefore  
171 we also characterized the antimicrobial resistome of the pigs longitudinally and in response to  
172 weaning age. Similar to the functional analysis, samples clustered by weaning age on d 21 and d  
173 28 when assessed using the relative abundance of antimicrobial resistance genes (ARGs) (Fig.  
174 5A). The large majority of ARGs that were differentially abundant were enriched in the nursing  
175 piglets compared to the weaned pigs (see Table S10 at  
176 <https://doi.org/10.6084/m9.figshare.c.5619817.v1>). Notable ARGs that were more relatively  
177 abundant in the weaned pigs included *bla<sub>ACL-1</sub>*, *cfxA6*, *erm(Q)*, *tet(44)*, and *tet(L)*. The relative  
178 abundance of ARGs conferring resistance to multiple drugs, aminoglycosides, polypeptides, and  
179 quinolones as well as several other drug classes decreased post-weaning in all weaning age  
180 groups (Fig. 5B). However, tetracycline resistance genes remained relatively stable throughout  
181 the pig production cycle. Of the 250 unique ARGs detected, *tet(Q)*, *tet(W)*, *tet(O)*, *aph(3')-IIIa*,  
182 *mel*, *tet(W/N/W)*, *tet(40)*, and *tet(44)* were the most relatively abundant among all samples (see  
183 Table S11 at <https://doi.org/10.6084/m9.figshare.c.5619817.v1>).

### 184 **Discussion**



185 As expected, there was a substantial shift in the pig gut microbiome within three days of  
186 weaning. The sudden change from a milk-based diet to one that is plant-based and less digestible  
187 by the pig is largely responsible for this shift immediately post-weaning (1, 14). However,  
188 weaning age had no apparent long-term effects on the gut microbiome or the average daily gain  
189 of the pigs. A recent study by Massacci et al. (15) that also weaned pigs at different ages (14, 21,  
190 28, and 42 d) with sampling up to 60 d of age also reported no weaning age effect on the  
191 microbial community structure at 60 d. Therefore, it appears that a later weaning age only delays  
192 post-weaning changes in the gut microbiome rather than affecting the assembly and stability of  
193 the microbial community.

194 Several short-chain fatty acid-producing bacterial species were prevalent among those  
195 that were more relatively abundant in pigs that had been weaned. These included *Anaerovibrio*  
196 *slackiae* (acetate, propionate), *B. porcorum* (butyrate), *Coprococcus catus* (butyrate, propionate),  
197 *F. prausnitzii* (butyrate), *Megasphaera elsdenii* (acetate, butyrate, propionate),  
198 *Phascolarctobacterium succinatutens* (propionate), *P. copri* (acetate), *Prevotella mizrahi*  
199 (acetate), *P. pectinovora* (acetate), and *S. bovis* (acetate, propionate) (16-21). Short-chain fatty  
200 acid-production occurs mostly in the lower gastrointestinal tract of pigs as a result of bacterial  
201 fermentation of undigested carbohydrates (22). Acetate, butyrate, and propionate have anti-  
202 inflammatory effects on the host (23) and provide up to 25% of daily energy requirements in pigs  
203 (24). Butyrate in particular is the primary energy source of colonocytes and regulates apoptosis  
204 (25).

205 Interestingly, *F. prausnitzii* has also been reported to be more relatively abundant at 60  
206 days of age in pigs weaned at 21, 28, and 42 d vs. 14 d (15) and in healthy pigs vs. those with  
207 post-weaning diarrhea (26). *Butyricicoccus porcorum* has been associated with higher feed

208 efficiency as have *Treponema porcinum* and *Treponema succinifaciens* which were also more  
209 relatively abundant in weaned pigs here (27). In-feed supplementation with *Butyricoccus*  
210 *pullicaecorum* has been shown to improve health and feed efficiency in broiler chickens (28) and  
211 *F. prausnitzii* reduced intestinal permeability and cytokine expression in a mouse colitis model  
212 (29). Therefore, *B. porcorum* and *F. prausnitzii*, as well as potentially other bacterial species that  
213 were more relatively abundant in weaned pigs, are attractive targets for microbiome  
214 manipulation and further study into their role in pig gut health.

215         The bacterial species that were enriched in the microbial communities of pigs that were  
216 still nursing at d 21 and d 28 include several potentially pathogenic species such as *C. difficile*, *E.*  
217 *coli*, *S. sonnei*, and *Streptococcus suis*. It is difficult to assess virulence of these species here,  
218 however, the presence of potentially pathogenic bacteria pre-weaning may be a risk factor for  
219 post-weaning morbidity and mortality (30). Although, many of the more relatively abundant  
220 bacterial species were differentially abundant pre- and post-weaning, several remained relatively  
221 stable throughout the pig production cycle. In particular, *Lactobacillus johnsonii*, *Mogibacterium*  
222 *kristiansenii*, and *Subdoligranulum variabile* were not affected by weaning. Among these  
223 bacterial species *L. johnsonii* is the best described and has been reported to improve sow  
224 reproductive performance (31) and average daily gain in piglets during the first 35 days of life  
225 (32) when delivered in feed. *S. variabile*, a butyrate-producing bacterial species, is the only  
226 member of its genus and has been previously reported to be a member of the “core microbiota”  
227 of the pig gastrointestinal tract (33). *M. kristiansenii* has only recently been described and was  
228 originally isolated from pig feces (18).

229         The functional profile of the gut microbiome also shifted after weaning in all weaning  
230 age groups similar to that of the taxonomic profiles. This included a decrease in the relative

231 abundance of all CAZy families post-weaning. The CAZymes encoded by the pig genome are  
232 greatly outnumbered by those in the gut microbiome thereby providing the host with an  
233 additional source of energy as discussed earlier. Sow's milk contains not only lactose but at least  
234 119 PMOs (34) which are composed of the monosaccharides fucose, galactose, glucose, N-  
235 acetylglucosamine, N-acetylgalactosamine, and sialic acid bound to a lactose or N-  
236 actelyllactosamine core (35). These PMOs are generally resistant to host digestive enzymes in  
237 the small intestine and are instead fermented by the colonic microbiome into SCFAs (36, 37).

238         In humans, *Bifidobacterium* and *Bacteroides* spp., including *B. fragilis* and *P. vulgatus*  
239 (formerly *Bacteroides vulgatus*), have been shown to metabolize human milk oligosaccharides  
240 (38). *Bacteroides fragilis*, which was among the most relatively abundant species in nursing  
241 piglets here, carries a number of glycoside hydrolase family genes that facilitate breakdown of  
242 milk oligosaccharides (39). Metabolites from the degradation of sialylated bovine milk  
243 oligosaccharides by *B. fragilis* has also been shown to enhance the growth of *E. coli* in vitro (40).  
244 All of the GH families found in *B. fragilis*, i.e., GH2, GH16, GH18, GH20, GH29, GH33, and  
245 GH95, were enriched in the gut microbiomes of nursing piglets. Similarly, GH families and  
246 CBMs associated with degradation of plant polysaccharides were more relatively abundant in  
247 fecal samples from pigs that had been weaned and consuming a solid plant-based diet for at least  
248 7 d.

249         The relative abundance of ARGs within several antimicrobial classes decreased post-  
250 weaning. However, ARGs conferring resistance to the tetracycline and MLS<sub>B</sub> classes remained  
251 relatively stable throughout the study despite the fact that none of the pigs were exposed to any  
252 antimicrobials. Not surprisingly, these are the antimicrobial classes with the longest history of  
253 use in swine production and are still among the most frequently administered antimicrobials in

254 North American pigs (41, 42). This background level of tetracycline and MLS<sub>B</sub> resistance  
255 probably also explains why several studies have reported limited or only temporary effects on the  
256 pig gut microbiome following exposure to drugs of these antimicrobial classes (8, 43, 44). The  
257 reason for the significant decrease in other ARGs after weaning is likely due to the post-weaning  
258 shift in bacterial taxa carrying these ARGs. For example, many of the relatively abundant  
259 multidrug ARGs such as *mdtF*, *acrF*, *evgS*, *acrB*, *mdtO*, *mdtP*, and *cpxA*, are found in the  
260 majority of *E. coli* and *S. sonnei* genomes and both of these species decreased in relative  
261 abundance post-weaning. In contrast, relatively abundant tetracycline resistance genes such as  
262 *tet(Q)*, *tet(W)*, and *tet(O)* have a much wider host range (45).

263 Two of the ARGs that were more relatively abundant in weaned piglets compared to  
264 those still nursing were the Ambler class A beta-lactamase genes *bla<sub>CfxA6</sub>* and *bla<sub>ACI-1</sub>*.  
265 Additionally, *bla<sub>CfxA2</sub>* was enriched in piglets weaned at d 14 and 21 compared to those still  
266 nursing on d 28. Both *bla<sub>CfxA2</sub>* and *bla<sub>CfxA6</sub>* have been identified in several *Prevotella* spp. (46)  
267 which likely accounts for the post-weaning enrichment of these ARGs. In *Prevotella* spp. the  
268 *bla<sub>CfxA</sub>* genes have been shown to confer resistance to ampicillin but not cefmetazole (47). The  
269 *bla<sub>ACI-1</sub>* gene may be associated with *M. elsdenii* as has been demonstrated in human gut  
270 metagenomes (48). Overall, these results again demonstrate the challenges faced when it comes  
271 to reducing antimicrobial resistance in swine as none of the pigs in this study were exposed to  
272 antimicrobials.

273 In conclusion, this study shows that weaning age has little effect on the long-term  
274 development and composition of the pig gut microbiome and resistome. Instead, the pig gut  
275 microbiome tends to change in a rather predictable manner post-weaning in a swine production  
276 environment. Many ARGs also persisted in the feces of the pigs throughout the study likely

277 reflecting the long history of use of certain antimicrobial classes in swine production. Several  
278 bacterial species with potential beneficial properties such as SCFA production were found to be  
279 enriched post-weaning and are attractive targets for future microbiome manipulation and culture-  
280 based studies.

## 281 **Experimental Procedures**

### 282 *Animals and experimental design*

283 All pig experiments were carried out at the swine unit of the Lacombe Research and  
284 Development Centre. Seven pregnant sows that farrowed within 24 h of each other were used in  
285 the study. A total of 45 piglets (n = 15 per weaning age group) were randomly selected for  
286 inclusion in the study based on litter, weight, and sex, with low-weight piglets excluded.  
287 Following weaning, all pigs were fed the same starter diet that was free of antibiotics, prebiotics,  
288 and probiotics (see Table S12 at <https://doi.org/10.6084/m9.figshare.c.5619817.v1>). Any pig that  
289 required an antibiotic treatment was removed from the study. Animals in this experiment were  
290 cared for in agreement with the Canadian Council for Animal Care (2009) guidelines. The  
291 Lacombe Research and Development Centre Animal Care Committee reviewed and approved all  
292 procedures and protocols involving animals.

293 On d 4 prior to sampling, 15 piglets were randomly chosen from among the 7 litters and  
294 designated to be weaned at 14, 21, or 28 days of age (Fig. S2). Piglets were sampled using fecal  
295 swabs (FLOQSwabs, Copan, Murrieta, CA, USA) beginning at 4 days of age and repeated on  
296 days 7 and 11. At 14 days of age, piglets assigned to the d 14 weaning group were removed from  
297 their sow after sampling and transferred to a nursery room within the swine barn. Fecal sampling  
298 continued for all piglets at 15, 18, and 21 d of age. On d 21, piglets in the d 21 weaned group  
299 were removed from their sow and placed in a nursery room. Fecal samples were taken from all

300 pigs on d 22, 25, and 28, and on d 28 the d 28-weaned piglets were weaned from their sow and  
301 placed in the nursery room. Piglets were then sampled on d 29, 32, 35, 42, 49, 56, 70, 84, 112,  
302 and 140. All fecal swabs were immediately placed on ice, transported to the laboratory, and  
303 stored at -80°C until DNA extraction.

#### 304 *DNA extraction and 16S rRNA gene and shotgun metagenomic sequencing*

305 DNA was extracted from fecal material collected on FLOQSwabs with the QIAamp  
306 BiOstic Bacteremia DNA Kit (Qiagen, Mississauga, ON, Canada) as per manufacturer's  
307 instructions with the following modifications. Sterile scissors were used to remove the swab  
308 which was then placed into a PowerBead tube with MBL solution and agitated at 70°C and 400  
309 rpm for 15 min. After heating, the tubes were shaken in a FastPrep-24 (MP Biomedicals, Solon,  
310 OH, USA) at 4.0 m/s for 45 s. Tubes were allowed to rest in the MP FastPrep-24 for 5 min.  
311 Using sterile forceps, swabs were removed from PowerBead tubes prior to pelleting debris at  
312 10,000 x g for 2 min. All remaining steps were followed as per the manufacturer's protocol.

313 Extracted bacterial DNA was loaded onto nine 96-well plates and two wells on each plate  
314 included a positive control (MSA-1002, 20 Strain Even Mix Genomic Material, ATCC,  
315 Manassas, VA, USA) and negative control (water). Negative extraction controls were also  
316 included. DNA was quantified and analyzed using the Qubit dsDNA HS Assay Kit (Thermo  
317 Fisher Scientific, Waltham, MA, USA) and Agilent High Sensitivity D1000 ScreenTape System  
318 (Santa Clara, CA, USA). The V4 hypervariable region of the 16S rRNA gene was amplified as  
319 per Kozich et al. (49). To prepare each 16S rRNA gene library, 5 µl of each sample from three  
320 96-well plates were pooled at a time. The pooled library was normalized to 0.4 nM and  
321 submitted to the Genomics Facility in the Infectious Bacterial Diseases Research Unit at USDA-

322 ARS-NADC in Ames, IA for 250 bp paired-end sequencing on a MiSeq instrument (Illumina,  
323 San Diego, CA) using v2 chemistry.

324 DNA from d 7, 14, 21, 28, 35, 70, and 140 of all pigs that remained in the study through  
325 to d 140 was also subjected to shotgun metagenomic sequencing. Metagenomic libraries were  
326 prepared using 700 ng of DNA and the TruSeq DNA PCR-Free Library Prep Kit (Illumina Inc.)  
327 following the manufacturer's recommended protocol. Briefly, DNA was fragmented to an  
328 average length of 400 bp with a Covaris LE220 instrument, end-repaired, A-tailed, and indexed  
329 with TruSeq Illumina adapters. Libraries were then validated on a Fragment Analyzer system  
330 with a High Sensitivity NGS Fragment Kit (Agilent Technologies, Mississauga, ON, Canada) to  
331 check for size and quantified by qPCR using the Kapa Library Quantification Illumina/ABI  
332 Prism Kit protocol (KAPA Biosystems, Wilmington, MA, USA). Equimolar quantities of each  
333 library were then pooled and sequenced on the Illumina NovaSeq 6000 instrument with a SP  
334 flowcell (2 x 250 bp) following manufacturer's instructions.

### 335 *16S rRNA gene sequence analysis*

336 The 16S rRNA were processed using DADA2 v. 1.14 (50) in R v. 3.6.3. Briefly, the  
337 forward and reverse reads were trimmed to 200 and 210 bp, respectively, merged with a  
338 minimum overlap of 75 bp, and chimeras removed. The RDP naive Bayesian classifier (51) and  
339 the SILVA SSU database release 138 (52) were then used to assign taxonomy to each merged  
340 sequence, referred to here as operational taxonomic units (OTUs) with 100% similarity. OTUs  
341 that were classified as chloroplasts, mitochondria, or eukaryotic in origin, and those that were  
342 identified in the extraction control samples at an equal or higher abundance than the biological  
343 samples were removed prior to analyses. The number of OTUs, Shannon diversity index, inverse  
344 Simpson's diversity index, and the Bray-Curtis dissimilarities were calculated in R v. 4.0.0 using

345 Phyloseq 1.32.0 (53) and vegan v. 2-5.6 (54). To account for uneven sequencing depth all  
346 samples were randomly subsampled to 6,900 sequences per sample prior to analyses.

### 347 *Metagenomic sequence analysis*

348 Metagenomic sequences were trimmed (quality score < 15 over a sliding window of 4 bp;  
349 minimum length of 50 bp) and sequencing adapters removed using Trimmomatic v. 0.38 (55).  
350 Bowtie2 v. 2.4.2-1 (56) was used to align host sequences to the *Sus scrofa* genome (Sscrofa11.1)  
351 for removal. Taxonomy was assigned to the filtered metagenomic sequences using Kaiju v. 1.7.3  
352 (57) and the NCBI non-redundant protein database (October 13, 2020). For functional profiling  
353 of the metagenomic samples, HUMAnN v. 3.0.0.alpha.1 (58) was used to align reads to the  
354 UniRef90 database which were then collapsed into MetaCyc metabolic and enzyme pathways  
355 (59). Reads were aligned to the Comprehensive Antibiotic Resistance Database (CARD) v. 3.0.8  
356 (60) and the Carbohydrate-Active enZymes (CAZy) Database (dbCAN2) v. 07312020 (61)  
357 using DIAMOND v. 0.9.28 (62) ( $\geq 90\%$  amino acid identify and  $\geq 90\%$  coverage).

### 358 *Statistical analysis*

359 Fisher's exact test was used to determine if weaning age was associated with removal  
360 from the study post-weaning due to antimicrobial treatment or death. The effect of weaning age  
361 on the microbial community structure was assessed using the Bray-Curtis dissimilarities and  
362 PERMANOVA (adonis2 function). The R package pairwiseAdonis (63) was used to compare the  
363 Bray-Curtis dissimilarities within each sampling time and the Benjamini-Hochberg procedure  
364 was used to correct P-values for multiple comparisons. The effect of weaning age on the relative  
365 abundance of microbial species, CAZy families, MetaCyc pathways, and ARGs was determined  
366 using MaAsLin2 (microbiome multivariable associations with linear models) v. 1.5.1 (64) in R.  
367 Only those microbial species with an average relative abundance of at least 0.1% and CAZy



368 families, MetaCyc pathways, and ARGs identified in at least 25% of samples were included in  
369 these analyses.

### 370 ***Data Availability***

371 All 16S rRNA gene and metagenomic sequencing data are available at the NCBI sequence read  
372 archive under BioProject PRJNA629856.

### 373 **Acknowledgements**

374 We thank the animal care staff at the Lacombe Research and Development Centre swine unit for  
375 their assistance and excellent care of the animals. We are also grateful to Cara Service and  
376 TingTing Liu for their valuable technical support. We thank David Alt and Crystal Loving for  
377 help with sequencing and Arun Kommadath for submitting the metagenomic sequences to the  
378 SRA. We also appreciate helpful feedback from Cassidy Klima. This research was supported by  
379 Alberta Agriculture and Forestry grant 2018R009R and also used resources provided by the  
380 SciNet project of the USDA ARS, ARS project number 0500-00093-001-00-D.

### 381 **References**

- 382 1. Lalles JP, Bosi P, Smidt H, Stokes CR. 2007. Nutritional management of gut health in  
383 pigs around weaning. *Proc Nutr Soc* 66:260-8.  
384 <https://doi.org/10.1017/S0029665107005484>.
- 385 2. Campbell JM, Crenshaw JD, Polo J. 2013. The biological stress of early weaned piglets. *J*  
386 *Anim Sci Biotechnol* 4:19. <https://doi.org/10.1186/2049-1891-4-19>.
- 387 3. Fairbrother JM, Nadeau E, Gyles CL. 2005. *Escherichia coli* in postweaning diarrhea in  
388 pigs: an update on bacterial types, pathogenesis, and prevention strategies. *Anim Health*  
389 *Res Rev* 6:17-39. <https://doi.org/10.1079/ahr2005105>.

- 390 4. Smith AL, Stalder KJ, Serenius TV, Baas TJ, Mabry JW. 2008. Effect of weaning age on  
391 nursery pig and sow reproductive performance. *J Swine Health Prod* 16:131-137.
- 392 5. Chen C, Zhou Y, Fu H, Xiong X, Fang S, Jiang H, Wu J, Yang H, Gao J, Huang L. 2021.  
393 Expanded catalog of microbial genes and metagenome-assembled genomes from the pig  
394 gut microbiome. *Nat Commun* 12:1106. <https://doi.org/10.1038/s41467-021-21295-0>.
- 395 6. Warr A, Affara N, Aken B, Beiki H, Bickhart DM, Billis K, Chow W, Eory L, Finlayson  
396 HA, Flicek P, Giron CG, Griffin DK, Hall R, Hannum G, Hourlier T, Howe K, Hume  
397 DA, Izuogu O, Kim K, Koren S, Liu H, Manchanda N, Martin FJ, Nonneman DJ,  
398 O'Connor RE, Phillippy AM, Rohrer GA, Rosen BD, Rund LA, Sargent CA, Schook LB,  
399 Schroeder SG, Schwartz AS, Skinner BM, Talbot R, Tseng E, Tuggle CK, Watson M,  
400 Smith TPL, Archibald AL. 2020. An improved pig reference genome sequence to enable  
401 pig genetics and genomics research. *Gigascience* 9:giaa051.  
402 <https://doi.org/10.1093/gigascience/giaa051>.
- 403 7. Frese SA, Parker K, Calvert CC, Mills DA. 2015. Diet shapes the gut microbiome of pigs  
404 during nursing and weaning. *Microbiome* 3:28. [https://doi.org/10.1186/s40168-015-0091-](https://doi.org/10.1186/s40168-015-0091-8)  
405 [8](https://doi.org/10.1186/s40168-015-0091-8).
- 406 8. Holman DB, Chenier MR. 2014. Temporal changes and the effect of subtherapeutic  
407 concentrations of antibiotics in the gut microbiota of swine. *FEMS Microbiol Ecol*  
408 90:599-608. <https://doi.org/10.1111/1574-6941.12419>.
- 409 9. Mach N, Berri M, Estelle J, Levenez F, Lemonnier G, Denis C, Leplat JJ, Chevaleyre C,  
410 Billon Y, Dore J, Rogel-Gaillard C, Lepage P. 2015. Early-life establishment of the swine  
411 gut microbiome and impact on host phenotypes. *Environ Microbiol Rep* 7:554-69.  
412 <https://doi.org/10.1111/1758-2229.12285>.

- 413 10. De Rodas B, Youmans BP, Danzeisen JL, Tran H, Johnson TJ. 2018. Microbiome  
414 profiling of commercial pigs from farrow to finish. *J Anim Sci* 96:1778-1794.  
415 <https://doi.org/10.1093/jas/sky109>.
- 416 11. Meisel JS, Hannigan GD, Tyldsley AS, SanMiguel AJ, Hodkinson BP, Zheng Q, Grice  
417 EA. 2016. Skin Microbiome Surveys Are Strongly Influenced by Experimental Design. *J*  
418 *Invest Dermatol* 136:947-956. <https://doi.org/10.1016/j.jid.2016.01.016>.
- 419 12. Cantarel BL, Lombard V, Henrissat B. 2012. Complex carbohydrate utilization by the  
420 healthy human microbiome. *PLoS One* 7:e28742.  
421 <https://doi.org/10.1371/journal.pone.0028742>.
- 422 13. Hamaker BR TY. 2014. A perspective on the complexity of dietary fiber structures and  
423 their potential effect on the gut microbiota. *J Mol Biol* 426:3838-3850.  
424 <https://doi.org/10.1016/j.jmb.2014.07.028>.
- 425 14. Gresse R, Chaucheyras-Durand F, Fleury MA, Van de Wiele T, Forano E, Blanquet-Diot  
426 S. 2017. Gut Microbiota Dysbiosis in Postweaning Piglets: Understanding the Keys to  
427 Health. *Trends Microbiol* 25:851-873. <https://doi.org/10.1016/j.tim.2017.05.004>.
- 428 15. Massacci FR BM, Lemonnier G, Guettier E, Blanc F, Jardet D, Rossignol MN, Mercat  
429 MJ, Doré J, Lepage P, Rogel-Gaillard C, Estellé J. 2020. Late weaning is associated with  
430 increased microbial diversity and *Faecalibacterium prausnitzii* abundance in the fecal  
431 microbiota of piglets. *Anim Microbiome* 2:1-12. [https://doi.org/10.1186/s42523-020-](https://doi.org/10.1186/s42523-020-0020-4)  
432 [0020-4](https://doi.org/10.1186/s42523-020-0020-4).
- 433 16. Nogrsek B, Accetto T, Fanedl L, Avgustin G. 2015. Description of a novel pectin-  
434 degrading bacterial species *Prevotella pectinovora* sp. nov., based on its phenotypic and  
435 genomic traits. *J Microbiol* 53:503-10. <https://doi.org/10.1007/s12275-015-5142-0>.

- 436 17. Hayashi H, Shibata K, Sakamoto M, Tomita S, Benno Y. 2007. *Prevotella copri* sp. nov.  
437 and *Prevotella stercorea* sp. nov., isolated from human faeces. Int J Syst Evol Microbiol  
438 57:941-946. <https://doi.org/10.1099/ijs.0.64778-0>.
- 439 18. Wylensek D, Hitch TCA, Riedel T, Afrizal A, Kumar N, Wortmann E, Liu T, Devendran  
440 S, Lesker TR, Hernandez SB, Heine V, Buhl EM, P MDA, Cumbo F, Fischoder T,  
441 Wyschkon M, Looft T, Parreira VR, Abt B, Doden HL, Ly L, Alves JMP, Reichlin M,  
442 Flisikowski K, Suarez LN, Neumann AP, Suen G, de Wouters T, Rohn S, Lagkouvardos  
443 I, Allen-Vercoe E, Sproer C, Bunk B, Taverne-Thiele AJ, Giesbers M, Wells JM,  
444 Neuhaus K, Schnieke A, Cava F, Segata N, Elling L, Strowig T, Ridlon JM, Gulder  
445 TAM, Overmann J, Clavel T. 2020. A collection of bacterial isolates from the pig  
446 intestine reveals functional and taxonomic diversity. Nat Commun 11:6389.  
447 <https://doi.org/10.1038/s41467-020-19929-w>.
- 448 19. Trachsel J, Humphrey S, Allen HK. 2018. *Butyricoccus porcorum* sp. nov., a butyrate-  
449 producing bacterium from swine intestinal tract. Int J Syst Evol Microbiol 68:1737-1742.  
450 <https://doi.org/10.1099/ijsem.0.002738>.
- 451 20. Zhang K, Dong X. 2009. *Selenomonas bovis* sp. nov., isolated from yak rumen contents.  
452 Int J Syst Evol Microbiol 59:2080-3. <https://doi.org/10.1099/ijs.0.007641-0>.
- 453 21. Levine UY, Looft T, Allen HK, Stanton TB. 2013. Butyrate-producing bacteria,  
454 including mucin degraders, from the swine intestinal tract. Appl Environ Microbiol  
455 79:3879-81. <https://doi.org/10.1128/AEM.00589-13>.
- 456 22. Haenen D, Zhang J, Souza da Silva C, Bosch G, van der Meer IM, van Arkel J, van den  
457 Borne JJ, Perez Gutierrez O, Smidt H, Kemp B, Muller M, Hooiveld GJ. 2013. A diet  
458 high in resistant starch modulates microbiota composition, SCFA concentrations, and

- 459 gene expression in pig intestine. J Nutr 143:274-83.  
460 <https://doi.org/10.3945/jn.112.169672>.
- 461 23. Rivière A SM, Lantin D, Leroy F, De Vuyst L. 2016. Bifidobacteria and butyrate-  
462 producing colon bacteria: importance and strategies for their stimulation in the human  
463 gut. Front Microbiol 7:979. <https://doi.org/10.3389/fmicb.2016.00979>.
- 464 24. Iyayi EA, Adeola O. 2015. Quantification of short-chain fatty acids and energy  
465 production from hindgut fermentation in cannulated pigs fed graded levels of wheat bran.  
466 J Anim Sci 93:4781-7. <https://doi.org/10.2527/jas.2015-9081>.
- 467 25. Jørgensen H LT, Zhao XQ, Eggum BO. 1997. The energy value of short-chain fatty acids  
468 infused into the caecum of pigs. Br J Nutr 77:745-756.  
469 <https://doi.org/10.1079/bjn19970072>.
- 470 26. Karasova D CM, Babak V, Jerabek M, Brzobohaty L, Matesova Z, Rychlik I. 2021.  
471 Development of piglet gut microbiota at the time of weaning influences development of  
472 postweaning diarrhea—A field study. Res Vet Sci 135:59-65.  
473 <https://doi.org/10.1016/j.rvsc.2020.12.022>.
- 474 27. Quan J, Wu Z, Ye Y, Peng L, Wu J, Ruan D, Qiu Y, Ding R, Wang X, Zheng E, Cai G,  
475 Huang W, Yang J. 2020. Metagenomic Characterization of Intestinal Regions in Pigs  
476 With Contrasting Feed Efficiency. Front Microbiol 11:32.  
477 <https://doi.org/10.3389/fmicb.2020.00032>.
- 478 28. Eeckhaut V, Wang J, Van Parys A, Haesebrouck F, Joossens M, Falony G, Raes J,  
479 Ducatelle R, Van Immerseel F. 2016. The Probiotic *Butyricicoccus pullicaecorum*  
480 Reduces Feed Conversion and Protects from Potentially Harmful Intestinal

- 481 Microorganisms and Necrotic Enteritis in Broilers. *Front Microbiol* 7:1416.  
482 <https://doi.org/10.3389/fmicb.2016.01416>.
- 483 29. Martin R, Miquel S, Chain F, Natividad JM, Jury J, Lu J, Sokol H, Theodorou V, Bercik  
484 P, Verdu EF, Langella P, Bermudez-Humaran LG. 2015. *Faecalibacterium prausnitzii*  
485 prevents physiological damages in a chronic low-grade inflammation murine model.  
486 *BMC Microbiol* 15:67. <https://doi.org/10.1186/s12866-015-0400-1>.
- 487 30. Gebhardt JT, Tokach MD, Dritz SS, DeRouchey JM, Woodworth JC, Goodband RD,  
488 Henry SC. 2020. Postweaning mortality in commercial swine production II: review of  
489 infectious contributing factors. *Transl Anim Sci* 4:txaa052.  
490 <https://doi.org/10.1093/tas/txaa052>.
- 491 31. Wang J, Ji H, Hou C, Wang S, Zhang D, Liu H, Shan D, Wang Y. 2014. Effects of  
492 *Lactobacillus johnsonii* XS4 supplementation on reproductive performance, gut  
493 environment, and blood biochemical and immunological index in lactating sows. *Livest*  
494 *Sci* 164:96-101. <https://doi.org/doi.org/10.1016/j.livsci.2014.03.008>.
- 495 32. Xin J, Zeng D, Wang H, Sun N, Zhao Y, Dan Y, Pan K, Jing B, Ni X. 2020. Probiotic  
496 *Lactobacillus johnsonii* BS15 Promotes Growth Performance, Intestinal Immunity, and  
497 Gut Microbiota in Piglets. *Probiotics Antimicrob Proteins* 12:184-193.  
498 <https://doi.org/10.1007/s12602-018-9511-y>.
- 499 33. Holman DB, Brunelle BW, Trachsel J, Allen HK. 2017. Meta-analysis To Define a Core  
500 Microbiota in the Swine Gut. *mSystems* 2. <https://doi.org/10.1128/mSystems.00004-17>.
- 501 34. Wei J WZ, Wang B, Jahan M, Wang Z, Wynn PC, Du Y. 2018. Characterization of  
502 porcine milk oligosaccharides over lactation between primiparous and multiparous  
503 female pigs. *Sci Rep* 8:1-16. <https://doi.org/10.1038/s41598-018-23025-x>.

- 504 35. Salcedo J FS, Mills DA, Barile D. 2016. Characterization of porcine milk  
505 oligosaccharides during early lactation and their relation to the fecal microbiome. *J Dairy*  
506 *Sci* 99:7733-7743. <https://doi.org/10.3168/jds.2016-10966>.
- 507 36. Difilippo E, Pan F, Logtenberg M, Willems RH, Braber S, Fink-Gremmels J, Schols HA,  
508 Gruppen H. 2016. Milk Oligosaccharide Variation in Sow Milk and Milk  
509 Oligosaccharide Fermentation in Piglet Intestine. *J Agric Food Chem* 64:2087-93.  
510 <https://doi.org/10.1021/acs.jafc.6b00497>.
- 511 37. Difilippo E PF, Logtenberg M, Willems RH, Braber S, Fink-Gremmels J, Schols HA,  
512 Gruppen H. 2016. In vitro fermentation of porcine milk oligosaccharides and galacto-  
513 oligosaccharides using piglet fecal inoculum. *J Agric Food Chem* 64:2127-2133.  
514 <https://doi.org/10.1021/acs.jafc.5b05384>.
- 515 38. Marcobal A, Barboza M, Froehlich JW, Block DE, German JB, Lebrilla CB, Mills DA.  
516 2010. Consumption of human milk oligosaccharides by gut-related microbes. *J Agric*  
517 *Food Chem* 58:5334-40. <https://doi.org/10.1021/jf9044205>.
- 518 39. Marcobal A, Sonnenburg JL. 2012. Human milk oligosaccharide consumption by  
519 intestinal microbiota. *Clin Microbiol Infect* 18 Suppl 4:12-5.  
520 <https://doi.org/10.1111/j.1469-0691.2012.03863.x>.
- 521 40. Charbonneau MR, O'Donnell D, Blanton LV, Totten SM, Davis JC, Barratt MJ, Cheng J,  
522 Guruge J, Talcott M, Bain JR, Muehlbauer MJ, Ilkayeva O, Wu C, Struckmeyer T, Barile  
523 D, Mangani C, Jorgensen J, Fan YM, Maleta K, Dewey KG, Ashorn P, Newgard CB,  
524 Lebrilla C, Mills DA, Gordon JJ. 2016. Sialylated Milk Oligosaccharides Promote  
525 Microbiota-Dependent Growth in Models of Infant Undernutrition. *Cell* 164:859-71.  
526 <https://doi.org/10.1016/j.cell.2016.01.024>.

- 527 41. Canada PHAo. 2020. Canadian Integrated Program for Antimicrobial Resistance  
528 Surveillance (CIPARS): 2018 Integrated Findings.  
529 [https://www.canada.ca/content/dam/phac-aspc/documents/services/surveillance/canadian-  
integrated-program-antimicrobial-resistance-surveillance-cipars/cipars-reports/2018-  
annual-report-integrated-findings/2018-annual-report-integrated-findings.pdf](https://www.canada.ca/content/dam/phac-aspc/documents/services/surveillance/canadian-<br/>530 integrated-program-antimicrobial-resistance-surveillance-cipars/cipars-reports/2018-<br/>531 annual-report-integrated-findings/2018-annual-report-integrated-findings.pdf). Accessed  
532 May 22, 2021.
- 533 42. USDA-APHIS-NAHMS. 2020. Antimicrobial Use and Stewardship on U.S. Swine  
534 Operations. 2017.
- 535 43. Pollock J, Muwonge A, Hutchings MR, Mainda G, Bronsvort BM, Gally DL,  
536 Corbishley A. 2020. Resistance to change: AMR gene dynamics on a commercial pig  
537 farm with high antimicrobial usage. *Sci Rep* 10:1708. [https://doi.org/10.1038/s41598-  
020-58659-3](https://doi.org/10.1038/s41598-<br/>538 020-58659-3).
- 539 44. Holman DB BB, Allen HK, Shippy DC, Loving CL, Kerr BJ, Bearson SMD, Brunelle  
540 BW. 2019. Chlortetracycline enhances tonsil colonization and fecal shedding of  
541 multidrug-resistant *Salmonella enterica* serovar Typhimurium DT104 without major  
542 alterations to the porcine tonsillar and intestinal microbiota. *Appl Environ Microbiol*  
543 85:e02354-18. <https://doi.org/10.1128/AEM.02354-18>.
- 544 45. Roberts MC, Schwarz S. 2017. Tetracycline and chloramphenicol resistance mechanisms,  
545 p 231-243, *Antimicrobial drug resistance*. Springer.
- 546 46. Binta B, Patel M. 2016. Detection of *cfxA2*, *cfxA3*, and *cfxA6* genes in beta-lactamase  
547 producing oral anaerobes. *J Appl Oral Sci* 24:142-7. [https://doi.org/10.1590/1678-  
775720150469](https://doi.org/10.1590/1678-<br/>548 775720150469).



- 549 47. Tran CM, Tanaka K, Watanabe K. 2013. PCR-based detection of resistance genes in  
550 anaerobic bacteria isolated from intra-abdominal infections. *J Infect Chemother* 19:279-  
551 90. <https://doi.org/10.1007/s10156-012-0532-2>.
- 552 48. Rands CM SE, Brüßow H, Kriventseva EV, Govorun VM, Zdobnov EM. 2018. ACI-1  
553 beta-lactamase is widespread across human gut microbiomes in Negativicutes due to  
554 transposons harboured by tailed prophages. *Environ Microbiol* 20:2288-2300.  
555 <https://doi.org/10.1111/1462-2920.14276>.
- 556 49. Kozich JJ, Westcott SL, Baxter NT, Highlander SK, Schloss PD. 2013. Development of a  
557 dual-index sequencing strategy and curation pipeline for analyzing amplicon sequence  
558 data on the MiSeq Illumina sequencing platform. *Appl Environ Microbiol* 79:5112-20.  
559 <https://doi.org/10.1128/AEM.01043-13>.
- 560 50. Callahan BJ, McMurdie PJ, Rosen MJ, Han AW, Johnson AJ, Holmes SP. 2016.  
561 DADA2: High-resolution sample inference from Illumina amplicon data. *Nat Methods*  
562 13:581-3. <https://doi.org/10.1038/nmeth.3869>.
- 563 51. Wang Q GG, Tiedje JM, Cole JR. 2007. Naive Bayesian classifier for rapid assignment  
564 of rRNA sequences into the new bacterial taxonomy. *Appl Environ Microbiol* 73:5261-  
565 5267. <https://doi.org/10.1128/AEM.00062-07>.
- 566 52. Quast C, Pruesse E, Yilmaz P, Gerken J, Schweer T, Yarza P, Peplies J, Glockner FO.  
567 2013. The SILVA ribosomal RNA gene database project: improved data processing and  
568 web-based tools. *Nucleic Acids Res* 41:D590-6. <https://doi.org/10.1093/nar/gks1219>.
- 569 53. McMurdie PJ, Holmes S. 2013. phyloseq: an R package for reproducible interactive  
570 analysis and graphics of microbiome census data. *PLoS One* 8:e61217.  
571 <https://doi.org/10.1371/journal.pone.0061217>.

- 572 54. Oksanen J, Blanchet FG, Kindt R, Legendre P, Minchin PR, O'hara R, Simpson GL,  
573 Solymos P, Stevens MHH, Wagner HJ. 2013. Package 'vegan'. 2:1-295.
- 574 55. Bolger AM, Lohse M, Usadel B. 2014. Trimmomatic: a flexible trimmer for Illumina  
575 sequence data. *Bioinformatics* 30:2114-20.  
576 <https://doi.org/10.1093/bioinformatics/btu170>.
- 577 56. Langmead B, Salzberg SL. 2012. Fast gapped-read alignment with Bowtie 2. *Nat*  
578 *Methods* 9:357-9. <https://doi.org/10.1038/nmeth.1923>.
- 579 57. Menzel P, Ng KL, Krogh A. 2016. Fast and sensitive taxonomic classification for  
580 metagenomics with Kaiju. *Nat Commun* 7:11257. <https://doi.org/10.1038/ncomms11257>.
- 581 58. Franzosa EA, McIver LJ, Rahnava G, Thompson LR, Schirmer M, Weingart G, Lipson  
582 KS, Knight R, Caporaso JG, Segata N, Huttenhower C. 2018. Species-level functional  
583 profiling of metagenomes and metatranscriptomes. *Nat Methods* 15:962-968.  
584 <https://doi.org/10.1038/s41592-018-0176-y>.
- 585 59. Caspi R, Billington R, Keseler IM, Kothari A, Krummenacker M, Midford PE, Ong WK,  
586 Paley S, Subhraveti P, Karp PD. 2020. The MetaCyc database of metabolic pathways and  
587 enzymes - a 2019 update. *Nucleic Acids Res* 48:D445-D453.  
588 <https://doi.org/10.1093/nar/gkz862>.
- 589 60. Alcock BP, Raphenya AR, Lau TTY, Tsang KK, Bouchard M, Edalatmand A, Huynh W,  
590 Nguyen AV, Cheng AA, Liu S, Min SY, Miroshnichenko A, Tran HK, Werfalli RE,  
591 Nasir JA, Oloni M, Speicher DJ, Florescu A, Singh B, Faltyn M, Hernandez-  
592 Koutoucheva A, Sharma AN, Bordeleau E, Pawlowski AC, Zubyk HL, Dooley D,  
593 Griffiths E, Maguire F, Winsor GL, Beiko RG, Brinkman FSL, Hsiao WWL, Domselaar  
594 GV, McArthur AG. 2020. CARD 2020: antibiotic resistance surveillance with the

- 595 comprehensive antibiotic resistance database. *Nucleic Acids Res* 48:D517-D525.  
596 <https://doi.org/10.1093/nar/gkz935>.
- 597 61. Zhang H, Yohe T, Huang L, Entwistle S, Wu P, Yang Z, Busk PK, Xu Y, Yin Y. 2018.  
598 dbCAN2: a meta server for automated carbohydrate-active enzyme annotation. *Nucleic*  
599 *Acids Res* 46:W95-W101. <https://doi.org/10.1093/nar/gky418>.
- 600 62. Buchfink B XC, Huson DH. 2015. Fast and sensitive protein alignment using  
601 DIAMOND. *Nat Methods* 12:59-60. <https://doi.org/10.1038/nmeth.3176>.
- 602 63. Arbizu M. 2021. Pairwise multilevel comparison using adonis. R package version 04.
- 603 64. Mallick H, Rahnavard A, McIver LJ, Ma S, Zhang Y, Nguyen LH, Tickle TL, Weingart  
604 G, Ren B, Schwager EH, Chatterjee S, Thompson KN, Wilkinson JE, Subramanian A, Lu  
605 Y, Waldron L, Paulson JN, Franzosa EA, Bravo HC, Huttenhower C. 2021. Multivariable  
606 Association Discovery in Population-scale Meta-omics Studies.  
607 doi:10.1101/2021.01.20.427420. <https://doi.org/10.1101/2021.01.20.427420>.

608  
609  
610

## 611 **Figure Legends**

612 **Figure 1.** Average daily gain in kg of pigs by weaning age within each weighing period.  
613 Different lowercase letters indicate significantly different means ( $P < 0.05$ ).

614 **Figure 2.** Non-metric multidimensional scaling plot of the Bray-Curtis dissimilarities for the pig  
615 fecal microbiota by weaning age and sampling day based on 16S rRNA gene sequencing.

616 **Figure 3.** The A) number of OTUs and B) Shannon diversity index values based on 16S rRNA  
617 gene sequencing and C) the 15 most relatively-abundant bacterial species based on shotgun

618 metagenomic sequencing for the pig fecal microbiome by weaning age and sampling day . In A  
619 and B, different lowercase letters indicate significantly different means ( $P < 0.05$ ). In C, species  
620 are ordered by overall percent relative abundance. *Butyricoccus porcorum* and  
621 *Faecalibacterium prausnitzii* are also included based on their enrichment post-weaning and  
622 butyrate-producing activities.

623 **Figure 4.** Non-metric multidimensional scaling plot of the Bray-Curtis dissimilarities for the A)  
624 CAZymes and B) MetaCyc metabolic pathways of the pig fecal microbiome and C) percent  
625 relative abundance of CAZyme classes by weaning age and sampling day.

626 **Figure 5.** Non-metric multidimensional scaling plot of the Bray-Curtis dissimilarities for the A)  
627 antimicrobial resistance genes and B) percent relative abundance of antimicrobial resistance  
628 genes by antimicrobial class by weaning age and sampling day.

#### 629 **Supplemental Material**

630 **Figure S1.** Non-metric multidimensional scaling plot of the Bray-Curtis dissimilarities for the  
631 fecal microbiota by weaning age and age of piglets.

632 **Figure S2.** Frequency of fecal sampling of the pigs in this study.

633 **Table S1.** Percent relative abundance of genera identified in the mock communities (ATCC  
634 MSA-1002) via 16S rRNA gene sequencing. Note: *Schaalia* spp. are classified as *Actinomyces*  
635 spp. within the SILVA SSU database.

636 **Table S2.** Pairwise PERMANOVA of the Bray-Curtis dissimilarities by weaning age within  
637 each sampling time.

638 **Table S3.** Percent relative abundance ( $\pm$  SEM) of microbial species by weaning age and  
639 sampling time based on metagenomic sequencing. Only those microbial species with a relative

640 abundance greater than 0.01% are included. Species are listed by overall percent relative  
641 abundance.

642 **Table S4.** Differentially abundant microbial species based on metagenomic sequencing.  
643 Negative coefficient values (highlighted) at 21 d of age indicate that the microbial species was  
644 more relatively abundant in the d 14-weaned pigs vs. the d 21- and 28-weaned pigs. Negative  
645 coefficient values (not highlighted) at 28 and 35 d of age indicate that the microbial species was  
646 more relatively abundant in the d 28-weaned pigs vs. the d 14- and 21-weaned pigs.

647 **Table S5.** Percent relative abundance ( $\pm$  SEM) of CAZy families detected in at least one sample  
648 by weaning age and sampling time.

649 **Table S6.** CAZy families detected in the *Sus scrofa* genome at 90% identity.

650 **Table S7.** Differentially abundant CAZy families on d 21 and 28 between weaned vs. nursing  
651 piglets. Negative coefficient values (highlighted) at 21 d of age indicate that the CAZy family  
652 was more relatively abundant in the d 14-weaned pigs vs. the d 21- and 28-weaned pigs.  
653 Negative coefficient values (not highlighted) at 28 d of age indicate that the CAZy family was  
654 more relatively abundant in the d 28-weaned pigs vs. the d 14- and 21-weaned pigs.

655 **Table S8.** Percent relative abundance ( $\pm$  SEM) of MetaCyc pathways detected in at least one  
656 metagenomic sample by weaning age and sampling time.

657

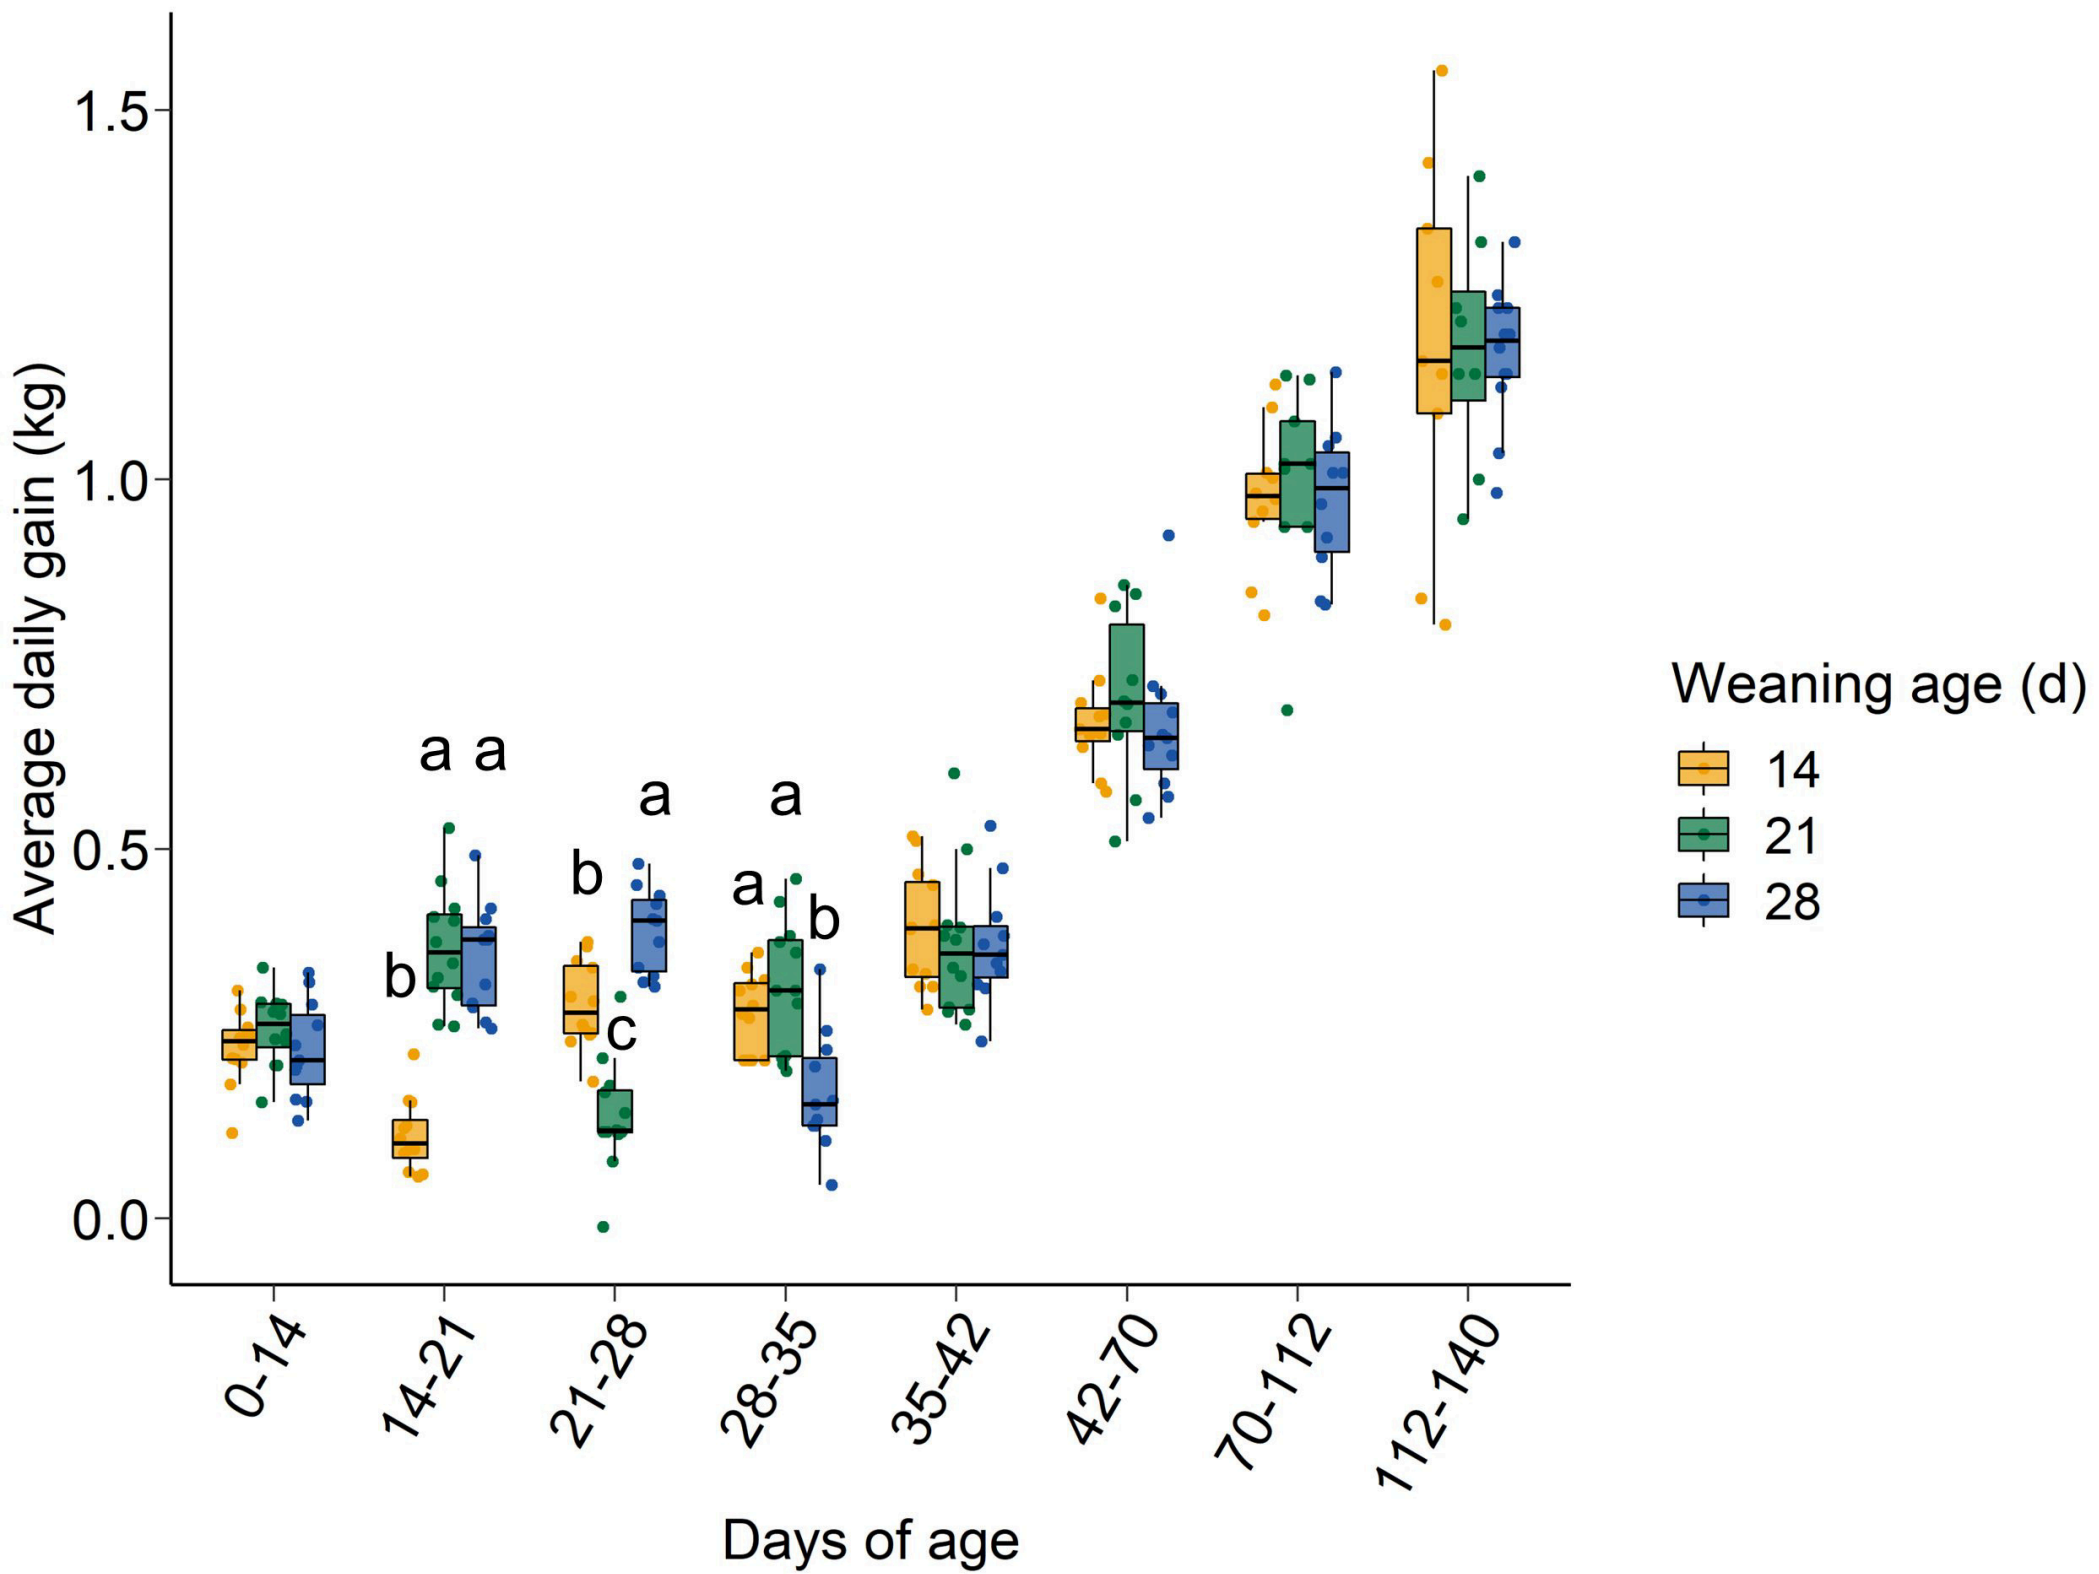

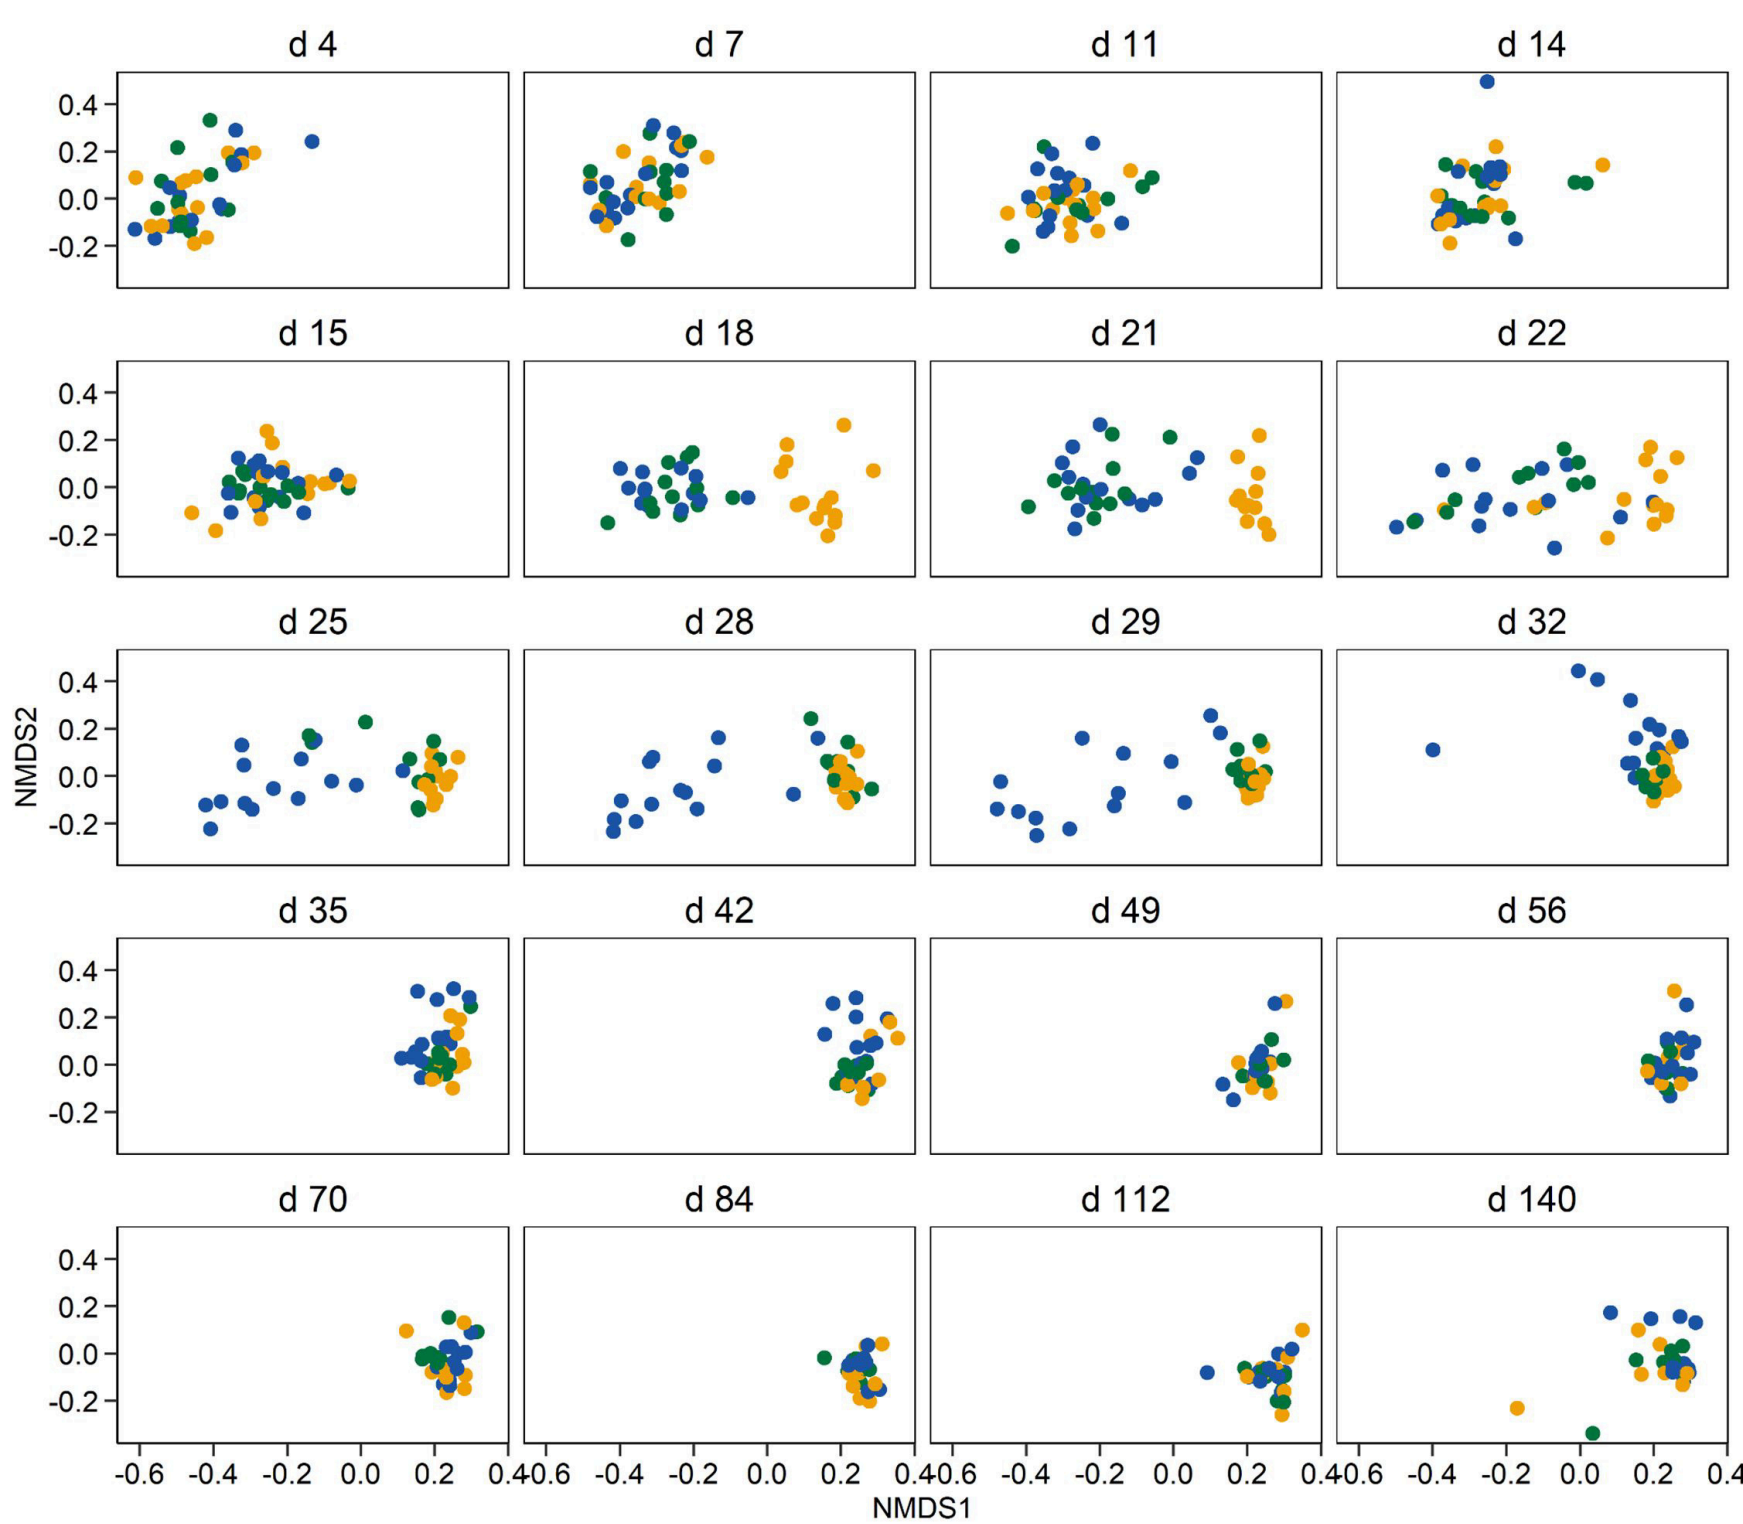



A

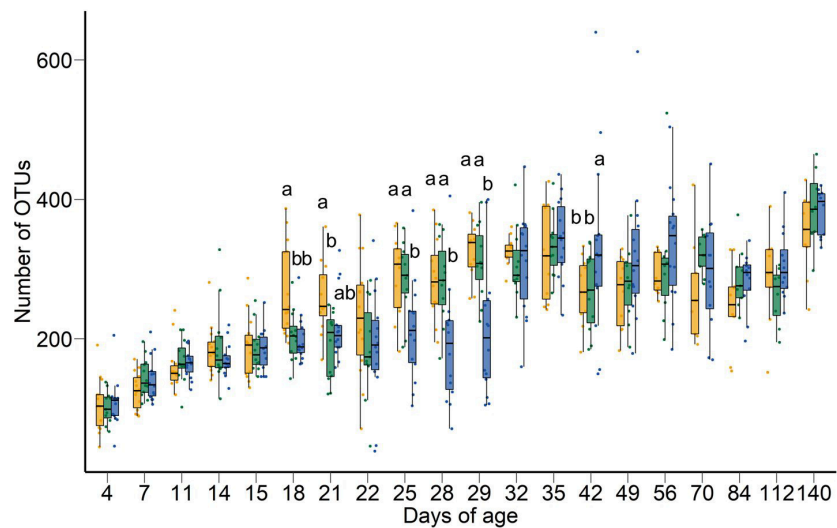

B

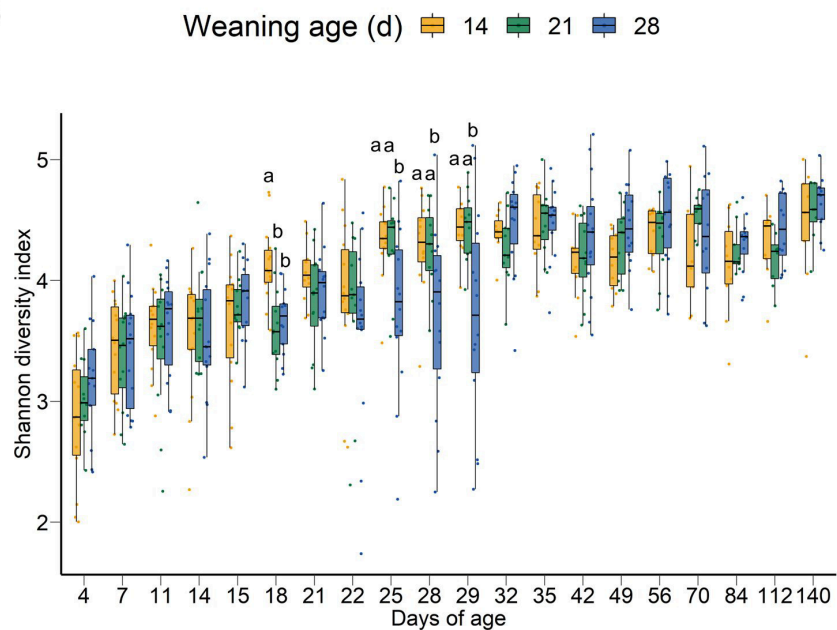

C

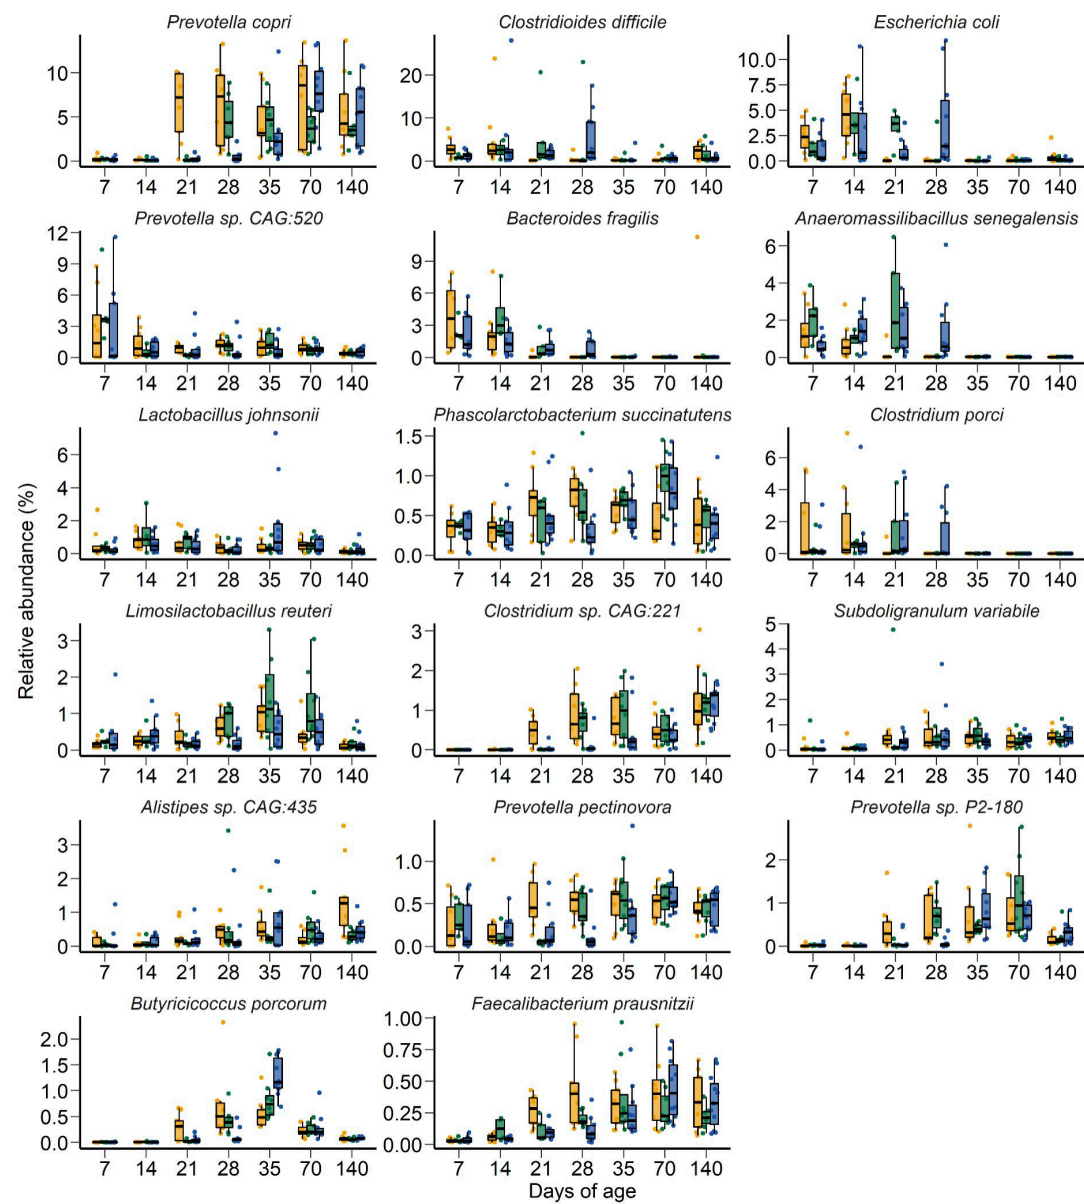



Figure 4.

A

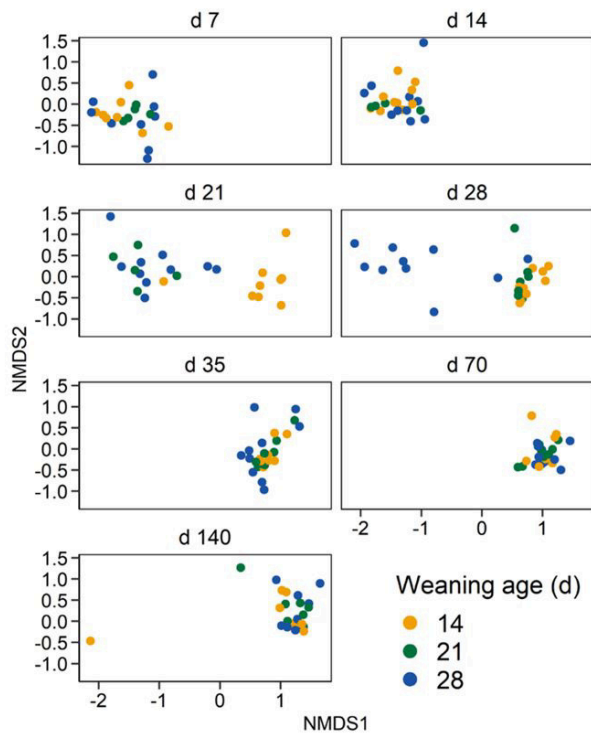

B

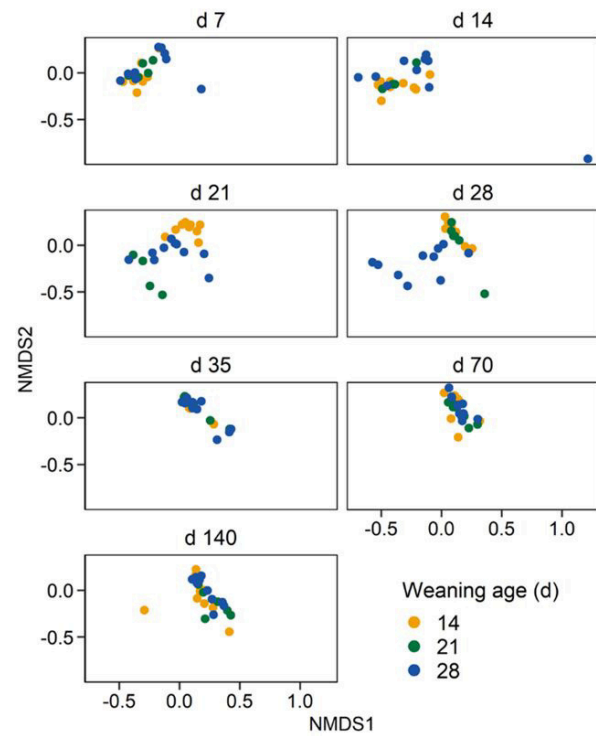

C

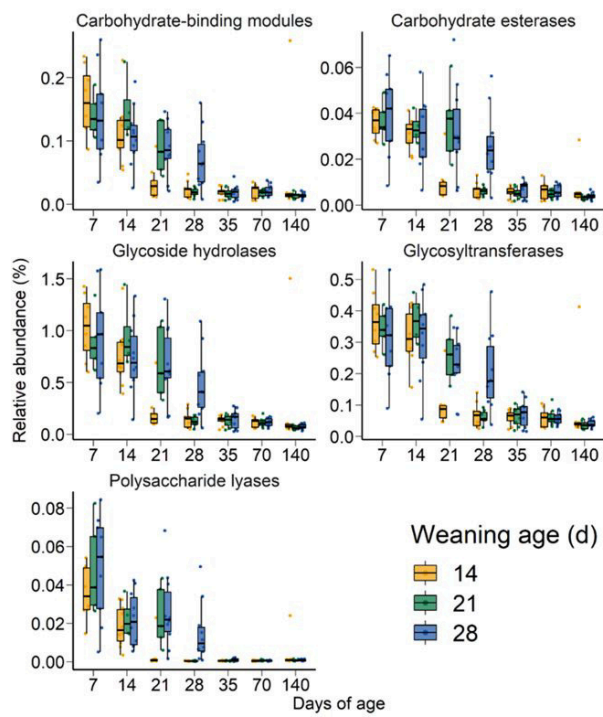

Figure 5.

A

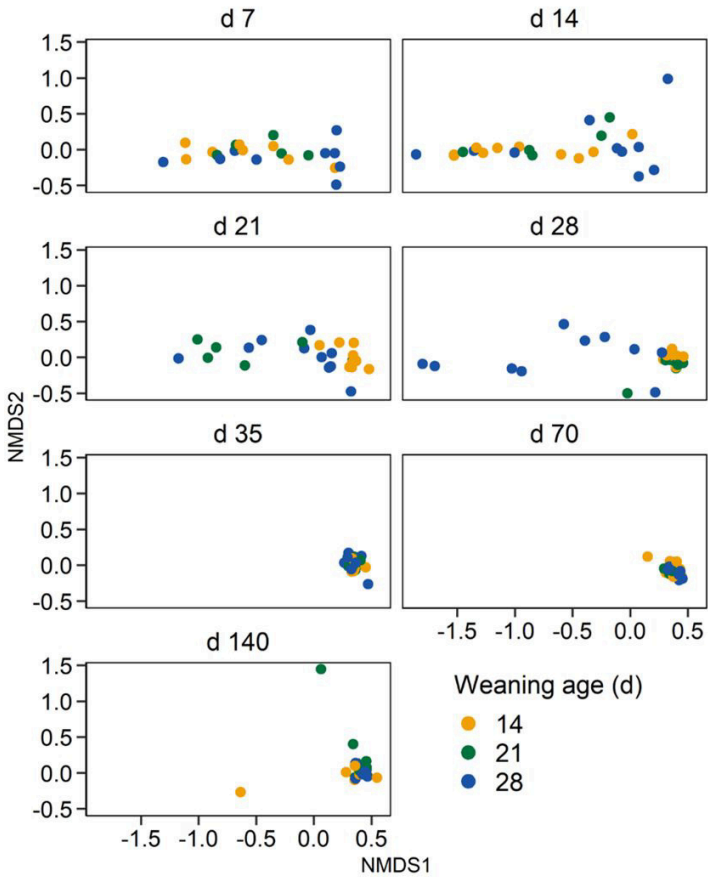

B

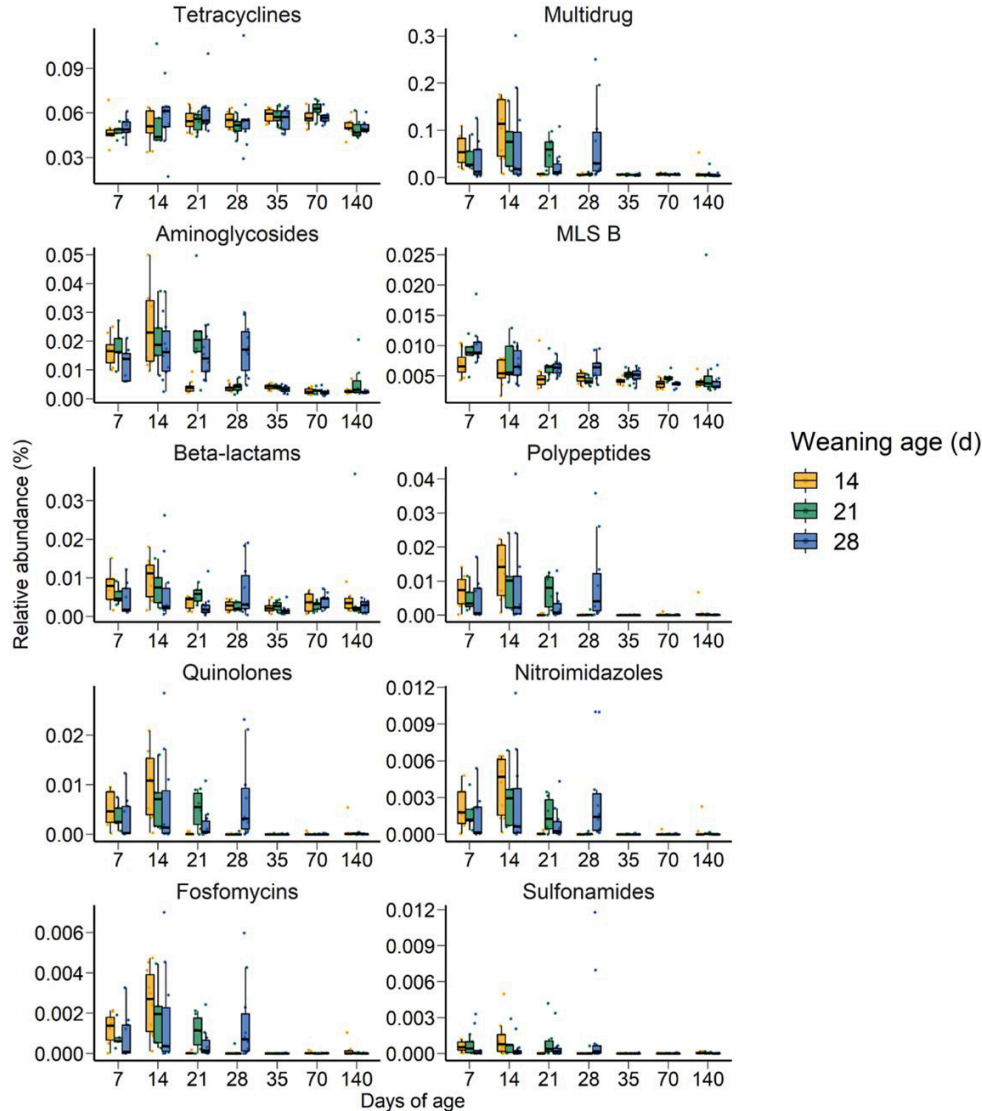

Source: https://www.biorxiv.org/content/10.1101/2021.05.20.444551v2.full.pdf
